# Supplementary material for: Budget Impact Analysis of the Introduction of Rituximab and Trastuzumab Intravenous Biosimilars to EU-5 Markets
Source: Springer Nature journal article supplement (doi:10.1007/s40259-020-00461-8), 2020-12-24
Supplement: MOESM1 [file 24111496]

**Article title:** Budget impact analysis of the introduction of rituximab and trastuzumab intravenous biosimilars to EU-5 markets

Journal: BioDrugs

**Authors:**

Jang, Minyoung, Celltrion Healthcare, 19, Academy-ro 51, Yeonsu-gu, Incheon, South Korea

Simoens, Steven KU Leuven Department of Pharmaceutical and Pharmacological Sciences, Leuven, Belgium. ORCID 0000-0002-9512-2005

\* Kwon, Taeksang, Celltrion Healthcare, 19, Academy-ro 51, Yeonsu-gu, Incheon, South Korea

**\* Corresponding author**

Kwon, Taeksang

Celltrion Healthcare, 19, Academy-ro 51, Yeonsu-gu, Incheon, South Korea

E-mail: Taeksang.Kwon@celltrionhc.com

**Funding:**

Celltrion Healthcare

**Conflict of Interest:**

SS is one of the founders of the KU Leuven Fund on Market Analysis of Biologics and Biosimilars following Loss of Exclusivity (MABEL Fund). SS was involved in a stakeholder roundtable on biologics and biosimilars sponsored by Amgen, Pfizer, and MSD; he has participated in advisory board meetings for Pfizer and Amgen; and he has contributed to studies on biologics and biosimilars for Hospira, Celltrion, Mundipharma, and Pfizer. SS has had speaker engagements for Celltrion, Sandoz and Amgen.

**1. Market volume share data for the Originator and the biosimilars (Base Case)**

**Supplementary Table 1: Market Volume Share Data for MabThera and Truxima (Base Case)**

| Country | Scenario                              | Year<br>Indication   | Year 1 |     | Year 2 |      | Year 3 |      | Year 4 |      | Year 5 |      |
|---------|---------------------------------------|----------------------|--------|-----|--------|------|--------|------|--------|------|--------|------|
|         |                                       |                      | IV     | SC  | IV     | SC   | IV     | SC   | IV     | SC   | IV     | SC   |
| UK      | MabThera in the world without Truxima | RA, CLL,<br>GPA, MPA | 100%   | 0%  | 100%   | 0%   | 100%   | 0%   | 100%   | 0%   | 100%   | 0%   |
|         | MabThera in the world with Truxima    |                      | 50%    | 0%  | 8%     | 0%   | 4%     | 0%   | 1%     | 0%   | 0%     | 0%   |
|         | Truxima                               |                      | 50%    |     | 92%    |      | 96%    |      | 99%    |      | 100%   |      |
|         | MabThera in the world without Truxima | NHLd, NHLf           | 50%    | 50% | 42%    | 58%  | 25%    | 75%  | 0%     | 100% | 0%     | 100% |
|         | MabThera in the world with Truxima    |                      | 27%    | 45% | 6%     | 38%  | 3%     | 38%  | 0%     | 38%  | 0%     | 38%  |
|         | Truxima                               |                      | 27%    |     | 56%    |      | 59%    |      | 61%    |      | 62%    |      |
| Germany | MabThera in the world without Truxima | RA, CLL,<br>GPA, MPA | 100%   | 0%  | 100%   | 0%   | 100%   | 0%   | 100%   | 0%   | 100%   | 0%   |
|         | MabThera in the world with Truxima    |                      | 75%    | 0%  | 41%    | 0%   | 12%    | 0%   | 0%     | 0%   | 0%     | 0%   |
|         | Truxima                               |                      | 25%    |     | 59%    |      | 88%    |      | 100%   |      | 100%   |      |
|         | MabThera in the world without Truxima | NHLd, NHLf           | 75%    | 25% | 75%    | 25%  | 75%    | 25%  | 75%    | 25%  | 75%    | 25%  |
|         | MabThera in the world with Truxima    |                      | 56%    | 25% | 32%    | 23%  | 10%    | 23%  | 0%     | 21%  | 0%     | 21%  |
|         | Truxima                               |                      | 19%    |     | 45%    |      | 68%    |      | 79%    |      | 79%    |      |
| France  | MabThera in the world without Truxima | RA, CLL,<br>GPA, MPA | 100%   | 0%  | 100%   | 0%   | 100%   | 0%   | 100%   | 0%   | 100%   | 0%   |
|         | MabThera in the world with Truxima    |                      | 58%    | 0%  | 22%    | 0%   | 0%     | 0%   | 0%     | 0%   | 0%     | 0%   |
|         | Truxima                               |                      | 42%    |     | 78%    |      | 100%   |      | 100%   |      | 100%   |      |
|         | MabThera in the world without Truxima | NHLd, NHLf           | 42%    | 58% | 32%    | 68%  | 21%    | 79%  | 11%    | 89%  | 1%     | 99%  |
|         | MabThera in the world with Truxima    |                      | 28%    | 52% | 11%    | 51%  | 0%     | 46%  | 0%     | 44%  | 0%     | 44%  |
|         | Truxima                               |                      | 20%    |     | 38%    |      | 53%    |      | 56%    |      | 56%    |      |
| Spain   | MabThera in the world without Truxima | RA, CLL,<br>GPA, MPA | 100%   | 0%  | 100%   | 0%   | 100%   | 0%   | 100%   | 0%   | 100%   | 0%   |
|         | MabThera in the world with Truxima    |                      | 87%    | 0%  | 65%    | 0%   | 41%    | 0%   | 16%    | 0%   | 0%     | 0%   |
|         | Truxima                               |                      | 13%    |     | 35%    |      | 59%    |      | 84%    |      | 100%   |      |
|         | MabThera in the world without Truxima | NHLd, NHLf           | 2%     | 98% | 0%     | 100% | 0%     | 100% | 0%     | 100% | 0%     | 100% |
|         | MabThera in the world with Truxima    |                      | 14%    | 84% | 12%    | 82%  | 7%     | 83%  | 2%     | 84%  | 0%     | 81%  |
|         | Truxima                               |                      | 2%     |     | 6%     |      | 10%    |      | 13%    |      | 19%    |      |

| Country | Scenario                              | Year                 | Year 1 |     | Year 2 |      | Year 3 |      | Year 4 |      | Year 5 |      |
|---------|---------------------------------------|----------------------|--------|-----|--------|------|--------|------|--------|------|--------|------|
|         |                                       | Indication           | IV     | SC  | IV     | SC   | IV     | SC   | IV     | SC   | IV     | SC   |
| Italy   | MabThera in the world without Truxima | RA, CLL,<br>GPA, MPA | 100%   | 0%  | 100%   | 0%   | 100%   | 0%   | 100%   | 0%   | 100%   | 0%   |
|         | MabThera in the world with Truxima    |                      | 75%    | 0%  | 16%    | 0%   | 0%     | 0%   | 0%     | 0%   | 0%     | 0%   |
|         | Truxima                               |                      | 25%    |     | 84%    |      | 100%   |      | 100%   |      | 100%   |      |
|         | MabThera in the world without Truxima | NHLd, NHLf           | 4%     | 96% | 0%     | 100% | 0%     | 100% | 0%     | 100% | 0%     | 100% |
|         | MabThera in the world with Truxima    |                      | 9%     | 88% | 2%     | 85%  | 0%     | 75%  | 0%     | 75%  | 0%     | 75%  |
|         | Truxima                               |                      | 3%     |     | 12%    |      | 25%    |      | 25%    |      | 25%    |      |

CLL: chronic lymphocytic leukaemia; DLBCL: Diffuse large B-cell lymphoma; EBC: early breast cancer; FL: Follicular lymphoma; GPA: granulomatosis with polyangiitis; Intravenous (IV); MBC: metastatic breast cancer, MGC: metastatic gastric cancer, MPA: microscopic polyangiitis; RA: rheumatoid arthritis; Subcutaneous (SC)

**Supplementary Table 2: Market Volume Share Data for Herceptin and Herzuma (Base Case)**

| Country | Scenario                               | Year          | Year 1 |     | Year 2 |     | Year 3 |     | Year 4 |     | Year 5 |     |
|---------|----------------------------------------|---------------|--------|-----|--------|-----|--------|-----|--------|-----|--------|-----|
|         |                                        | Indication    | IV     | SC  |
| UK      | Herceptin in the world without Herzuma | EBC, MBC, MGC | 29%    | 71% | 29%    | 71% | 29%    | 71% | 29%    | 71% | 29%    | 71% |
|         | Herceptin in the world with Herzuma    |               | 17%    | 68% | 0%     | 61% | 0%     | 61% | 0%     | 61% | 0%     | 61% |
|         | Herzuma                                |               | 15%    |     | 39%    |     | 39%    |     | 39%    |     | 39%    |     |
| Germany | Herceptin in the world without Herzuma | EBC, MBC, MGC | 76%    | 24% | 76%    | 24% | 74%    | 26% | 73%    | 27% | 71%    | 29% |
|         | Herceptin in the world with Herzuma    |               | 53%    | 23% | 18%    | 22% | 0%     | 21% | 0%     | 21% | 0%     | 21% |
|         | Herzuma                                |               | 24%    |     | 60%    |     | 79%    |     | 79%    |     | 79%    |     |
| France  | Herceptin in the world without Herzuma | EBC, MBC, MGC | 39%    | 61% | 36%    | 64% | 34%    | 66% | 31%    | 69% | 29%    | 71% |
|         | Herceptin in the world with Herzuma    |               | 19%    | 61% | 0%     | 57% | 0%     | 55% | 0%     | 55% | 0%     | 55% |
|         | Herzuma                                |               | 19%    |     | 43%    |     | 45%    |     | 45%    |     | 45%    |     |
| Spain   | Herceptin in the world without Herzuma | EBC, MBC, MGC | 32%    | 68% | 27%    | 73% | 21%    | 79% | 15%    | 85% | 9%     | 91% |
|         | Herceptin in the world with Herzuma    |               | 30%    | 62% | 12%    | 61% | 0%     | 56% | 0%     | 56% | 0%     | 56% |
|         | Herzuma                                |               | 8%     |     | 27%    |     | 44%    |     | 44%    |     | 44%    |     |
| Italy   | Herceptin in the world without Herzuma | EBC, MBC, MGC | 50%    | 50% | 50%    | 50% | 49%    | 51% | 49%    | 51% | 49%    | 51% |
|         | Herceptin in the world with Herzuma    |               | 39%    | 46% | 17%    | 42% | 1%     | 42% | 0%     | 42% | 0%     | 42% |
|         | Herzuma                                |               | 14%    |     | 41%    |     | 58%    |     | 58%    |     | 58%    |     |

CLL: chronic lymphocytic leukaemia; DLBCL: Diffuse large B-cell lymphoma; EBC: early breast cancer; FL: Follicular lymphoma; GPA: granulomatosis with polyangiitis; Intravenous (IV); MBC: metastatic breast cancer, MGC: metastatic gastric cancer, MPA: microscopic polyangiitis; RA: rheumatoid arthritis; Subcutaneous (SC)

## 2. Population Data

**Supplementary Table 3.** Population and growth rate of the EU-5 countries

| Country | Year | Population | Growth rate |
|---------|------|------------|-------------|
| UK      | 2016 | 65,648,054 | 0.70% [1]   |
| France  | 2018 | 67,186,638 | 0.30% [2]   |
| Germany | 2017 | 82,792,351 | 0.30% [3]   |
| Spain   | 2018 | 46,698,569 | 0.45% [4]   |
| Italy   | 2017 | 60,589,445 | -0.32% [5]  |

**Supplementary Table 4** Incidence of each indication per 1,000 patient-years in the EU-5 countries

| Indication | UK           | France      | Germany     | Spain            | Italy       |
|------------|--------------|-------------|-------------|------------------|-------------|
| RA         | 0.42 [6]     | 0.088 [7]   | 0.4 [8]     | 0.083 [9]        | 0.98 [10]   |
| CLL        | 0.057 [11]   | 0.0705 [12] | 0.067 [13]  | 0.0635 [14]      | 0.045 [15]  |
| GPA        | 0.0283 [16]  | 0.015 [17]  | 0.01 [18]   | 0.0295 [19]      | 0.0024 [20] |
| MPA        | 0.0152 [16]  | 0.01 [17]   | 0.0026 [21] | 0.0791 [19]      | 0.001 [22]  |
| NHL*       | 0.24 [23,24] | 0.219 [24]  | 0.206 [24]  | 0.16726 [23,24]  | 0.208 [24]  |
| EBC        | 1.235 [25]   | 1.482 [26]  | 1.35 [27]   | 0.8406 [28,29]   | 0.717 [30]  |
| MBC        | 0.14 [25]    | 0.08 [31]   | 0.17 [27]   | 0.042384 [28,29] | 0.08 [30]   |
| MGC        | 0.081 [25]   | 0.08 [31]   | 0.12 [27]   | 0.14445 [32]     | 0.211 [30]  |

*\*Incidence of each country reported by the WHO IARC was converted to incidence per 1000 patient-years.*

**Supplementary Table 5** Eligible patients for MabThera®, Truxima®, and Herceptin®

|               | Country    | UK                    | France                | Germany               | Spain                 | Italy                 |
|---------------|------------|-----------------------|-----------------------|-----------------------|-----------------------|-----------------------|
| Intervention  | Indication | Eligible patients (%) |
| MabThera® IV  | RA         | 10 [33–35]            | 18 [33,35]            | 30 [35,36]            | 10 [33,35]            | 10 [33,35]            |
| MabThera® SC  | CLL        | 100 [34,35]           | 45 [35,37]            | 100 [35]              | 100 [35]              | 100 [35]              |
| Truxima®      | GPA        | 100 [34,35]           | 100 [35]              | 100 [35]              | 100 [35]              | 100 [35]              |
|               | MPA        | 100 [34,35]           | 100 [35]              | 100 [35]              | 100 [35]              | 100 [35]              |
|               | NHLf       | 49.9 [34,35,37]       | 54 [17,35]            | 80 [35,38]            | 49.9 [35,37]          | 49.9 [35,37]          |
|               | NHLd       | 100 [34,35]           | 100 [35]              | 100 [35]              | 100 [35]              | 100 [35]              |
| Herceptin® IV | EBC        | 17.5 [39–41]          | 12 [31,39]            | 19 [39,42]            | 17.5 [37,39]          | 17.5 [39,43]          |
| Herceptin® SC | MBC        | 17.5 [40]             | 30 [31,39]            | 19 [39,42]            | 17.5 [37,39]          | 17.5 [39,43]          |
| Herzuma®      | MGC        | 25.8 [39,40,44]       | 18 [31,39]            | 21 [39,45]            | 25.8 [39,43]          | 25.8 [39,44]          |

**Supplementary Table 6** Total eligible patients for Truxima® and Herzuma® in UK

| Year                                        | Year 1       | Year 2       | Year 3       | Year 4       | Year 5       | Total         |
|---------------------------------------------|--------------|--------------|--------------|--------------|--------------|---------------|
| RA patients (IV)                            | 2,189        | 2,205        | 2,220        | 2,236        | 2,251        | 11,101        |
| CLL patients (IV)                           | 2,971        | 2,992        | 3,013        | 3,034        | 3,055        | 15,065        |
| GPA patients (IV)                           | 1,475        | 1,486        | 1,496        | 1,506        | 1,517        | 7,480         |
| MPA patients (IV)                           | 792          | 798          | 804          | 809          | 815          | 4,018         |
| NHLf patients (IV/SC)                       | 1,438        | 1,448        | 1,458        | 1,468        | 1,479        | 7,291         |
| NHLd patients (IV/SC)                       | 7,428        | 7,480        | 7,532        | 7,585        | 7,638        | 37,663        |
| <b>Total eligible patients for Truxima®</b> | <b>8,865</b> | <b>8,929</b> | <b>8,991</b> | <b>9,053</b> | <b>9,117</b> | <b>44,955</b> |
| EBC patients (IV/SC)                        | 5,710        | 5,750        | 5,790        | 5,831        | 5,871        | 28,952        |
| MBC patients (IV/SC)                        | 634          | 639          | 643          | 648          | 652          | 3,216         |
| MGC patients (IV/SC)                        | 1,089        | 1,097        | 1,105        | 1,112        | 1,120        | 5,523         |
| <b>Total eligible patients for Herzuma®</b> | <b>7,433</b> | <b>7,486</b> | <b>7,538</b> | <b>7,591</b> | <b>7,643</b> | <b>37,691</b> |



**Supplementary Table 7** Total eligible patients for Truxima® and Herzuma® in France

| Year                                        | Year 1        | Year 2        | Year 3        | Year 4        | Year 5        | Total         |
|---------------------------------------------|---------------|---------------|---------------|---------------|---------------|---------------|
| RA patients (IV)                            | 833           | 835           | 838           | 840           | 843           | 4,189         |
| CLL patients (IV)                           | 1,668         | 1,673         | 1,678         | 1,683         | 1,688         | 8,390         |
| GPA patients (IV)                           | 788           | 791           | 793           | 796           | 798           | 3,966         |
| MPA patients (IV)                           | 526           | 527           | 529           | 530           | 532           | 2,644         |
| NHLf patients (IV/SC)                       | 1,955         | 1,961         | 1,967         | 1,973         | 1,979         | 9,835         |
| NHLd patients (IV/SC)                       | 5,861         | 5,879         | 5,897         | 5,914         | 5,932         | 29,483        |
| <b>Total eligible patients for Truxima®</b> | <b>11,631</b> | <b>11,666</b> | <b>11,702</b> | <b>11,736</b> | <b>11,772</b> | <b>58,507</b> |
| EBC patients (IV/SC)                        | 4,894         | 4,908         | 4,923         | 4,938         | 4,953         | 24,616        |
| MBC patients (IV/SC)                        | 651           | 653           | 655           | 657           | 659           | 3,273         |
| MGC patients (IV/SC)                        | 757           | 759           | 761           | 764           | 766           | 3,807         |
| <b>Total eligible patients for Herzuma®</b> | <b>6,302</b>  | <b>6,320</b>  | <b>6,339</b>  | <b>6,359</b>  | <b>6,378</b>  | <b>31,696</b> |

**Supplementary Table 8** Total eligible patients for Truxima® and Herzuma® in Germany

| <b>Year</b>                                 | <b>Year 1</b> | <b>Year 2</b> | <b>Year 3</b> | <b>Year 4</b> | <b>Year 5</b> | <b>Total</b>   |
|---------------------------------------------|---------------|---------------|---------------|---------------|---------------|----------------|
| RA patients (IV)                            | 8,171         | 8,196         | 8,220         | 8,245         | 8,270         | 41,102         |
| CLL patients (IV)                           | 4,562         | 4,576         | 4,590         | 4,603         | 4,617         | 22,948         |
| GPA patients (IV)                           | 681           | 683           | 685           | 687           | 689           | 3,425          |
| MPA patients (IV)                           | 177           | 178           | 178           | 179           | 179           | 891            |
| NHLf patients (IV/SC)                       | 3,791         | 3,803         | 3,814         | 3,825         | 3,837         | 19,070         |
| NHLd patients (IV/SC)                       | 8,074         | 8,098         | 8,122         | 8,147         | 8,171         | 40,612         |
| <b>Total eligible patients for Truxima®</b> | <b>25,456</b> | <b>25,534</b> | <b>25,609</b> | <b>25,686</b> | <b>25,763</b> | <b>128,048</b> |
| EBC patients (IV/SC)                        | 8,850         | 8,876         | 8,903         | 8,929         | 8,956         | 44,514         |
| MBC patients (IV/SC)                        | 1,114         | 1,118         | 1,121         | 1,124         | 1,128         | 5,605          |
| MGC patients (IV/SC)                        | 1,716         | 1,721         | 1,726         | 1,731         | 1,737         | 8,631          |
| <b>Total eligible patients for Herzuma®</b> | <b>11,680</b> | <b>11,715</b> | <b>11,750</b> | <b>11,784</b> | <b>11,821</b> | <b>58,750</b>  |

**Supplementary Table 9** Total eligible patients for Truxima® and Herzuma® in Spain

| <b>Year</b>                                 | <b>Year 1</b> | <b>Year 2</b> | <b>Year 3</b> | <b>Year 4</b> | <b>Year 5</b> | <b>Total</b>  |
|---------------------------------------------|---------------|---------------|---------------|---------------|---------------|---------------|
| RA patients (IV)                            | 320           | 322           | 323           | 325           | 326           | 1,616         |
| CLL patients (IV)                           | 2,450         | 2,461         | 2,472         | 2,483         | 2,494         | 12,360        |
| GPA patients (IV)                           | 1,138         | 1,143         | 1,148         | 1,154         | 1,159         | 5,742         |
| MPA patients (IV)                           | 3,052         | 3,066         | 3,079         | 3,093         | 3,107         | 15,397        |
| NHLf patients (IV/SC)                       | 1,103         | 1,108         | 1,113         | 1,118         | 1,123         | 5,565         |
| NHLd patients (IV/SC)                       | 4,192         | 4,211         | 4,230         | 4,249         | 4,268         | 21,150        |
| <b>Total eligible patients for Truxima®</b> | <b>12,255</b> | <b>12,311</b> | <b>12,365</b> | <b>12,422</b> | <b>12,477</b> | <b>61,830</b> |
| EBC patients (IV/SC)                        | 2,894         | 2,907         | 2,920         | 2,933         | 2,947         | 14,601        |
| MBC patients (IV/SC)                        | 146           | 147           | 147           | 148           | 149           | 737           |
| MGC patients (IV/SC)                        | 1,438         | 1,444         | 1,451         | 1,457         | 1,464         | 7,254         |
| <b>Total eligible patients for Herzuma®</b> | <b>4,478</b>  | <b>4,498</b>  | <b>4,518</b>  | <b>4,538</b>  | <b>4,560</b>  | <b>22,592</b> |

**Supplementary Table 10** Total eligible patients for Truxima® and Herzuma® in Italy

| <b>Year</b>                                 | <b>Year 1</b> | <b>Year 2</b> | <b>Year 3</b> | <b>Year 4</b> | <b>Year 5</b> | <b>Total</b>  |
|---------------------------------------------|---------------|---------------|---------------|---------------|---------------|---------------|
| RA patients (IV)                            | 5,120         | 5,103         | 5,087         | 5,071         | 5,055         | 25,436        |
| CLL patients (IV)                           | 2,351         | 2,343         | 2,336         | 2,328         | 2,321         | 11,679        |
| GPA patients (IV)                           | 125           | 125           | 125           | 124           | 124           | 623           |
| MPA patients (IV)                           | 52            | 52            | 52            | 52            | 52            | 260           |
| NHLf patients (IV/SC)                       | 941           | 938           | 935           | 932           | 929           | 4,675         |
| NHLd patients (IV/SC)                       | 3,772         | 3,760         | 3,748         | 3,736         | 3,724         | 18,740        |
| <b>Total eligible patients for Truxima®</b> | <b>12,361</b> | <b>12,321</b> | <b>12,283</b> | <b>12,243</b> | <b>12,205</b> | <b>61,413</b> |
| EBC patients (IV/SC)                        | 3,369         | 3,359         | 3,348         | 3,337         | 3,326         | 16,739        |
| MBC patients (IV/SC)                        | 376           | 375           | 374           | 372           | 371           | 1,868         |
| MGC patients (IV/SC)                        | 2,844         | 2,835         | 2,826         | 2,817         | 2,808         | 14,130        |
| <b>Total eligible patients for Herzuma®</b> | <b>6,589</b>  | <b>6,569</b>  | <b>6,548</b>  | <b>6,526</b>  | <b>6,505</b>  | <b>32,737</b> |

**Supplementary Table 11:**SmPC indications for each originator and biosimilars

| Originator, Biosimilar          | Indication                                 |
|---------------------------------|--------------------------------------------|
| MabThera IV(1),<br>Truxima (2)  | Rheumatoid arthritis                       |
|                                 | Chronic lymphocytic leukaemia              |
|                                 | Granulomatosis with polyangiitis           |
|                                 | Microscopic polyangiitis                   |
|                                 | Non-Hodgkin lymphoma, follicular           |
|                                 | Non-Hodgkin lymphoma, diffuse large B cell |
| MabThera SC(3)                  | Non-Hodgkin lymphoma, follicular           |
|                                 | Non-Hodgkin lymphoma, diffuse large B cell |
| Herceptin IV(4),<br>Herzuma (5) | Early breast cancer                        |
|                                 | Metastatic breast cancer                   |
|                                 | Metastatic gastric cancer                  |
| Herceptin SC(6)                 | Early breast cancer                        |
|                                 | Metastatic breast cancer                   |
|                                 | Metastatic gastric cancer                  |

### 3. Drug dosage

**Supplementary Table 12:** Mean dose of MabThera IV/SC and Herceptin IV/SC obtained from the SmPC

| Drug                          | Indication     | Mean dose                                                                                                                                | Dosing                                                                                                                             |
|-------------------------------|----------------|------------------------------------------------------------------------------------------------------------------------------------------|------------------------------------------------------------------------------------------------------------------------------------|
| MabThera IV(1), Truxima (2)   | RA             | 2000                                                                                                                                     | <ul style="list-style-type: none"> <li>• 1000mg followed by 1000mg 2 weeks later</li> <li>• Repeat cycle after 24 weeks</li> </ul> |
|                               | CLL            | <ul style="list-style-type: none"> <li>• Loading dose: 375 mg/m<sup>2</sup></li> <li>• Maintenance dose: 500 mg/m<sup>2</sup></li> </ul> | <ul style="list-style-type: none"> <li>• Week 1</li> <li>• Weekly (6 weeks)</li> </ul>                                             |
|                               | GPA            | 375 mg                                                                                                                                   | Weekly (4 weeks)                                                                                                                   |
|                               | MPA            | 375 mg                                                                                                                                   | Weekly (4 weeks)                                                                                                                   |
|                               | FL             | 375 mg                                                                                                                                   | Weekly (8 weeks T1, 6 weeks T2 and 4 weeks T3)                                                                                     |
|                               | DLBCL          | 375 mg                                                                                                                                   | Weekly (8 weeks)                                                                                                                   |
|                               | MabThera SC(3) | FL                                                                                                                                       | 1400 mg                                                                                                                            |
|                               | DLBCL          | 1400 mg                                                                                                                                  | Weekly (8 weeks)                                                                                                                   |
| Herceptin IV(4), Herzumab (5) | EBC            | <ul style="list-style-type: none"> <li>• Loading dose: 8 mg/kg</li> <li>• Maintenance dose: 6 mg/kg</li> </ul>                           | <ul style="list-style-type: none"> <li>• Week 1</li> <li>• Weekly (17 weeks)</li> </ul>                                            |
|                               | MBC            | <ul style="list-style-type: none"> <li>• Loading dose: 8 mg/kg</li> <li>• Maintenance dose: 6 mg/kg</li> </ul>                           | <ul style="list-style-type: none"> <li>• Week 1</li> <li>• Weekly (17 weeks)</li> </ul>                                            |
|                               | MGC            | <ul style="list-style-type: none"> <li>• Loading dose: 8 mg/kg</li> <li>• Maintenance dose: 6 mg/kg</li> </ul>                           | <ul style="list-style-type: none"> <li>• Week 1</li> <li>• Weekly (17 weeks)</li> </ul>                                            |
| Herceptin SC(6)               | EBC            | 600 mg/kg                                                                                                                                | Weekly (18 weeks)                                                                                                                  |
|                               | MBC            | 600 mg/kg                                                                                                                                | Weekly (18 weeks)                                                                                                                  |
|                               | MGC            | 600 mg/kg                                                                                                                                | Weekly (18 weeks)                                                                                                                  |

**4. Administration costs for intravenous and subcutaneous MabThera and Herceptin**  
**Supplementary Table 13:** Administration tariffs for intravenous and subcutaneous MabThera and Herceptin for the UK

| Drug      |                                                                      | Intravenous (£) | Subcutaneous (£) | Source                                                                                                                 |
|-----------|----------------------------------------------------------------------|-----------------|------------------|------------------------------------------------------------------------------------------------------------------------|
| MabThera  | Administration tariff in RA and MPA<br><i>(standard infusion)</i>    | 351.00          | 351.00           | National Tariff Payment System, HRG HD23J Inflammatory, Spine, Joint or Connective Tissue Disorders, with CC Score 0-2 |
|           | Administration tariff in GPA<br><i>(standard infusion)</i>           | 423.00          | 423.00           | National Tariff Payment System, HRG JD07K Skin Disorders without Interventions, with CC Score 0-1                      |
|           | Administration tariff in NHLf and NHLd<br><i>(standard infusion)</i> | 299.00          | 299.00           | National Tariff Payment System, HRG SB13Z, Delivery Tariff                                                             |
| Herceptin | Administration<br><i>(loading injection)</i>                         | 299.00          | 299.00           | National Tariff Payment System, HTG SB97Z (attendance), SB08Z (Procurement) and SB12Z (Delivery)                       |
|           | Administration<br><i>(maintenance injection)</i>                     | 150.00          | 150.00           | National Tariff Payment System, HTG SB97Z (attendance), SB08Z (Procurement) and SB12Z (Delivery)                       |

CLL: chronic lymphocytic leukaemia, EBC: early breast cancer, GPA: granulomatosis with polyangiitis, HRG: Healthcare Resource Group, MBC: metastatic breast cancer, MGC: metastatic gastric cancer, MPA: microscopic polyangiitis, NHLd: Non-Hodgkin Lymphoma, diffuse, NHLf: Non-Hodgkin Lymphoma, follicular, RA: rheumatoid arthritis

**Supplementary Table 14:** Administration tariffs for intravenous and subcutaneous MabThera and Herceptin for France

| Mode of administration | Cost (€) | Source         |
|------------------------|----------|----------------|
| Intravenous            | 383.11   | ATIH 2019 [46] |
| Subcutaneous           | 383.11   | ATIH 2019 [46] |

ATIH: Agence Technique de l'Information sur l'Hospitalisation

**Supplementary Table 15:** Administration tariffs for intravenous and subcutaneous MabThera and Herceptin for Germany

| Mode of administration | Rituximab administration cost (€) | Trastuzumab administration cost (€) | Source        |
|------------------------|-----------------------------------|-------------------------------------|---------------|
| Intravenous            | 144.61                            | 105.48                              | EBM 2018 [47] |
| Subcutaneous           | 74.40                             | 88.75                               | EBM 2018 [47] |

EBM: Einheitlicher Bewertungsmaßstab

**Supplementary Table 16:** Administration tariffs for intravenous and subcutaneous MabThera and Herceptin for Spain

| Mode of administration | Cost (€) | Source                       |
|------------------------|----------|------------------------------|
| Intravenous            | 478.32   | e-Salud, 2017 [48], CPI [49] |
| Subcutaneous           | 478.32   | e-Salud, 2017 [48], CPI [49] |

**Supplementary Table 17:** Administration tariffs for intravenous and subcutaneous MabThera and Herceptin for Italy

| Mode of administration | Cost (€) | Source                                          |
|------------------------|----------|-------------------------------------------------|
| Intravenous            | 45.70    | RegioneLombardia, La Giunta 2012 [50], CPI [49] |
| Subcutaneous           | 45.70    | RegioneLombardia, La Giunta 2012 [50], CPI [49] |



## 5. Price per drug across EU-5

**Supplementary Table 18:** Price per milligram applied in the model for EU-5 countries

| Country | Product                          | MabThera IV<br>(200 mg pack<br>size) | MabThera IV<br>(500 mg pack<br>size) | MabThera<br>SC | Truxima (200<br>mg pack<br>size) | Truxima (500<br>mg pack<br>size) | Herceptin IV | Herceptin SC | Herzuma |
|---------|----------------------------------|--------------------------------------|--------------------------------------|----------------|----------------------------------|----------------------------------|--------------|--------------|---------|
| UK*     | Cost per pack (£)                | 349.25                               | 873.15                               | 1,344.65       | 314.33                           | 785.84                           | 407.4        | 1,263.48     | 366.66  |
|         | Cost per mg (£)                  | 1.75                                 | 1.75                                 | 0.96           | 1.57                             | 1.57                             | 2.72         | 2.11         | 2.44    |
| Germany | Cost per pack (€)                | 840.19                               | 2,044.49                             | 2,844.34       | 700.99                           | 1,761.05                         | 866.4        | 2,545.21     | 782.01  |
|         | Cost per mg (€)                  | 4.2                                  | 4.09                                 | 2.03           | 3.5                              | 3.52                             | 5.78         | 4.24         | 5.21    |
| Italy   | Cost per pack (€)                | 916.29                               | 2,290.29                             | 2,914.39       | 733.03                           | 1,832.23                         | 1,056.93     | 3,022.82     | 845.54  |
|         | Cost per mg (€)                  | 4.58                                 | 4.58                                 | 2.08           | 3.67                             | 3.66                             | 7.05         | 5.04         | 5.64    |
| Spain   | Cost per pack (€)                | 567.93                               | 1,342.06                             | 1,896.47       | 490.68                           | 1,149.47                         | 678.53       | 1,693.32     | 585.47  |
|         | Cost per mg (€)                  | 2.84                                 | 2.68                                 | 1.35           | 2.45                             | 2.3                              | 4.52         | 2.82         | 3.9     |
| France  | Cost per pack (€)                | 339.2                                | 848                                  | 1,519.81       | 339.2                            | 848                              | 356.84       | 1,331.78     | 356.84  |
|         | Cost per pack after discount (€) | 305.28                               | 763.2                                | NA             | 271.36                           | 678.4                            | 321.16       | NA           | 285.47  |
|         | Cost per mg, undiscounted (€)    | 1.7                                  | 1.7                                  | 1.09           | 1.36                             | 1.36                             | 2.38         | 2.22         | 1.9     |

## 6. Resource Costing for the UK

**Supplementary Table 19:** HCP time reported for administration and preparation of treatments

|                 | Product                                           | Minutes | Comments                                                                                                                           |
|-----------------|---------------------------------------------------|---------|------------------------------------------------------------------------------------------------------------------------------------|
| Preparation     | MabThera IV                                       |         | No drug preparation time reported                                                                                                  |
|                 | MabThera SC                                       |         | No drug preparation time reported                                                                                                  |
|                 | Herceptin IV [51]                                 | 34.5    | Drug preparation completed by pharmacist                                                                                           |
|                 | Herceptin SC [51]                                 | 0       | No drug preparation time reported                                                                                                  |
| Administration* | MabThera IV<br>( <i>standard infusion</i> ) [52]  | 117.9   | Scenario where nurse cares for 3.5 patients concurrently (i.e. each patient occupies 29% of their time)                            |
|                 | MabThera IV<br>( <i>rapid infusion</i> ) [35,53]  | 90.0    | Scenario where first cycle is given as per standard administration rate then switched to rapid infusion rate on subsequent cycles. |
|                 | MabThera SC [52]                                  | 48.5    | Scenario where nurse cares for 3.5 patients concurrently (i.e. each patient occupies 29% of their time); no change from base case  |
|                 | Herceptin IV<br>( <i>standard infusion</i> ) [51] | 58.1    |                                                                                                                                    |
|                 | Herceptin IV<br>( <i>rapid infusion</i> ) [39]    | 30.0    | Scenario where first cycle is given as per standard administration rate then switched to rapid infusion rate on subsequent cycles. |
|                 | Herceptin SC [51]                                 | 24.6    |                                                                                                                                    |

HCP: healthcare professional, IV: intravenous, SC: subcutaneous,

**Supplementary Table 20:** Resources used for intravenous and subcutaneous MabThera and Herceptin

| Drug      |                                                        | Intravenous (£) | Subcutaneous (£) |
|-----------|--------------------------------------------------------|-----------------|------------------|
| MabThera  | Administration<br>( <i>standard infusion</i> ) [52,54] | 80.57           | 33.14            |
|           | Administration<br>( <i>rapid infusion</i> ) [35,54]    | 61.50           | NA               |
|           | Consumables<br>(inflated values) [52]                  | 14.12           | 1.28             |
| Herceptin | Administration<br>( <i>standard infusion</i> ) [51,54] | 65.34           | 16.81            |
|           | Administration<br>( <i>rapid infusion</i> ) [39,54]    | 20.50           | NA               |
|           | Consumables<br>(inflated values) [52]                  | 14.12           | 1.28             |

PSSRU: Personal Social Services Research Unit, SmPC: Summary of product characteristics

## 7. Summary of scenario analyses

**Supplementary Figure 1:** Summary of net budget impact results for Truxima (200mg pack size): Base case and scenario 1-3 analyses for France

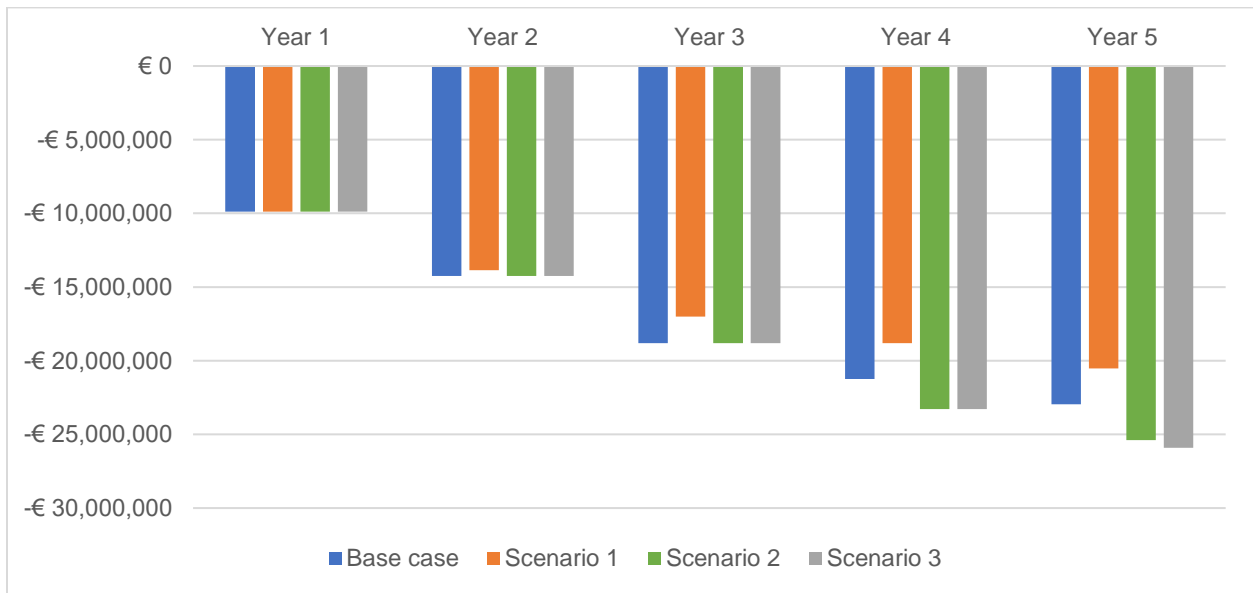

**Supplementary Figure 2:** Summary of net budget impact results for Herzuma : Base case and scenario 1-3 analyses for France

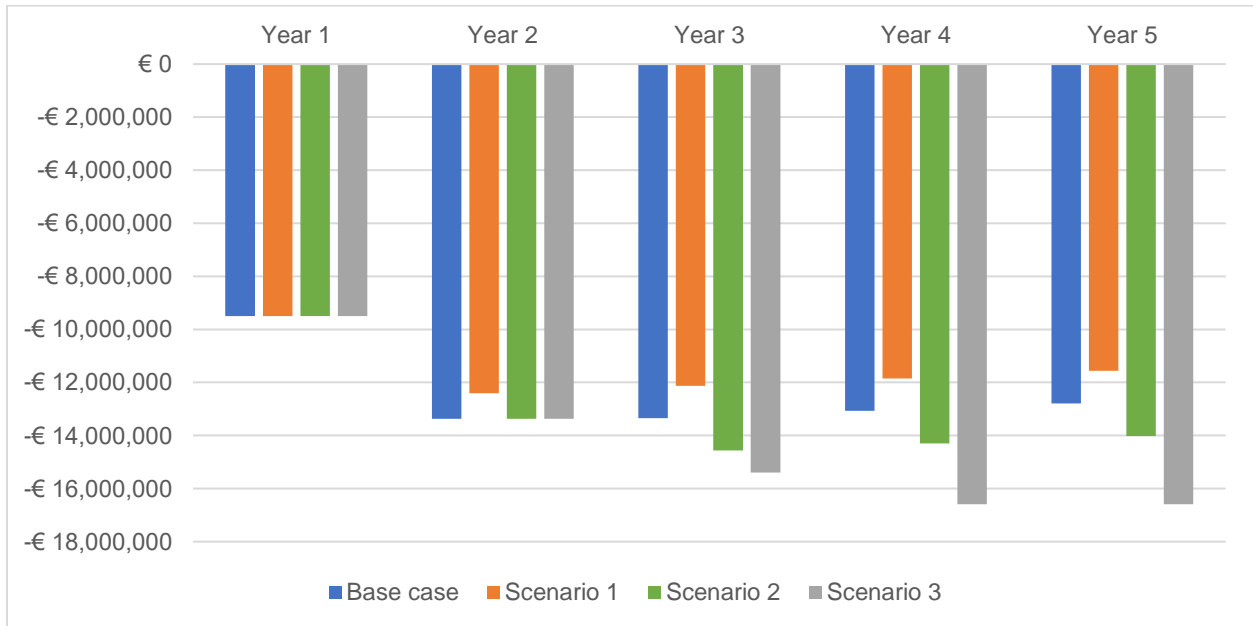

**Supplementary Figure 3:** Summary of net budget impact results for Truxima (200mg pack size): Base case and scenario 1-3 analyses for Germany

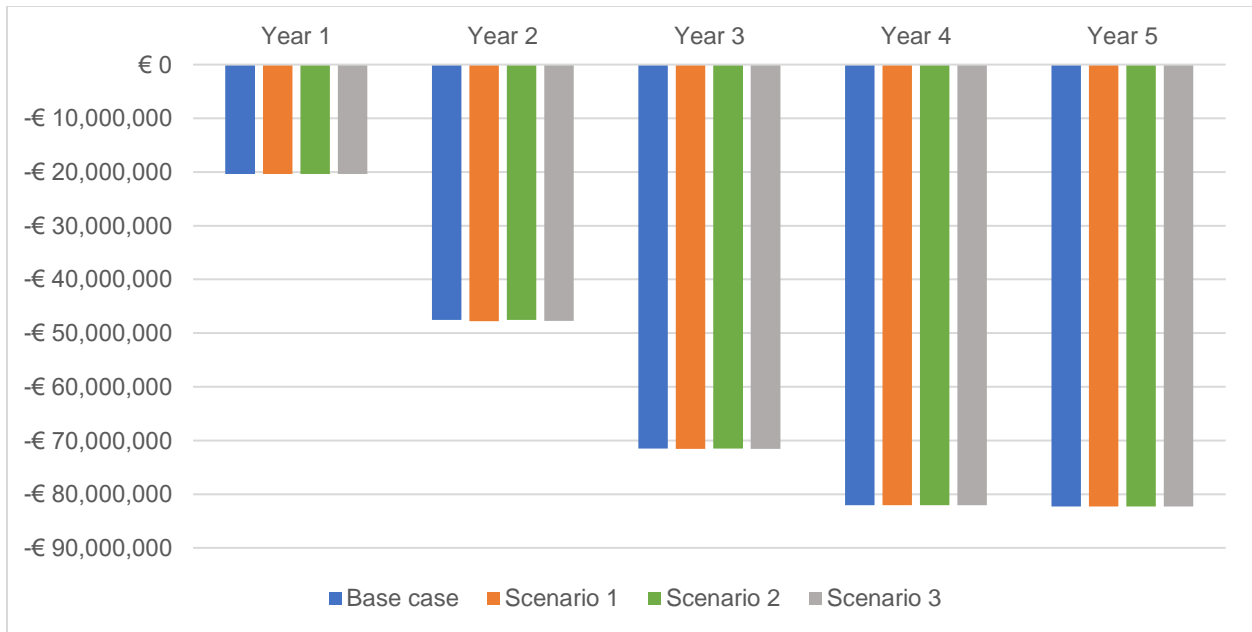

**Supplementary Figure 4:** Summary of net budget impact results for Herzuma : Base case and scenario 1-3 analyses for Germany

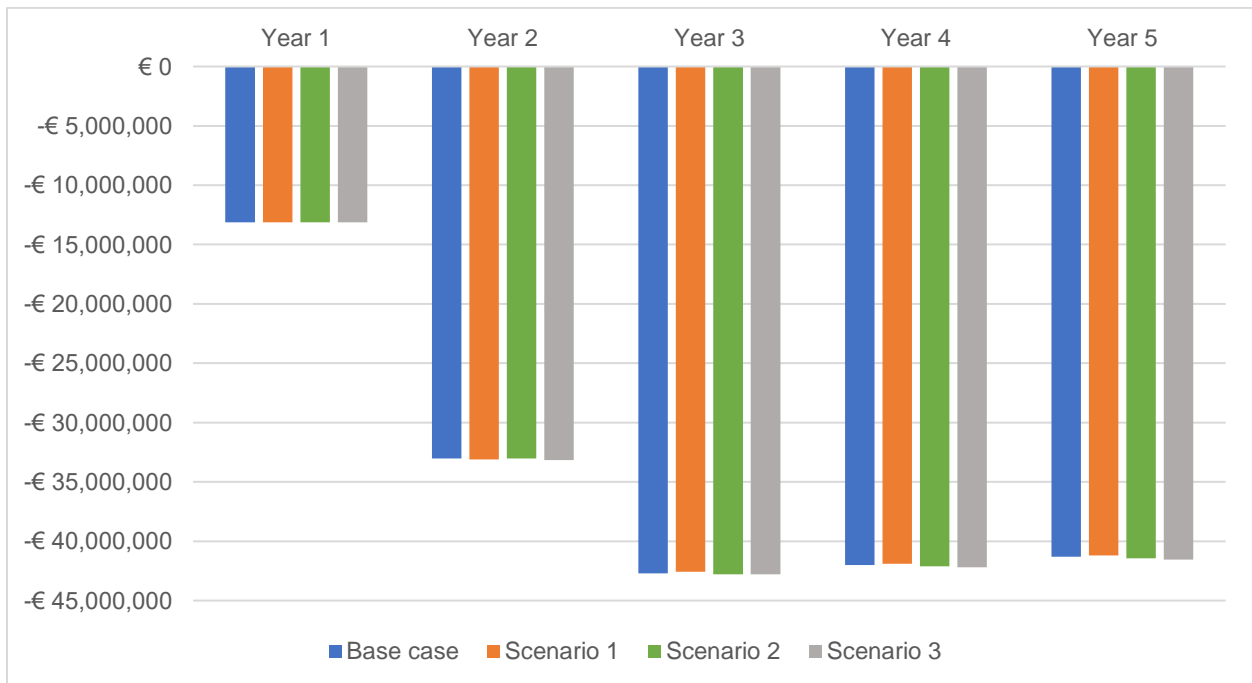

**Supplementary Figure 5:** Summary of net budget impact results for Truxima (200mg pack size): Base case and scenario 1-3 analyses for Spain

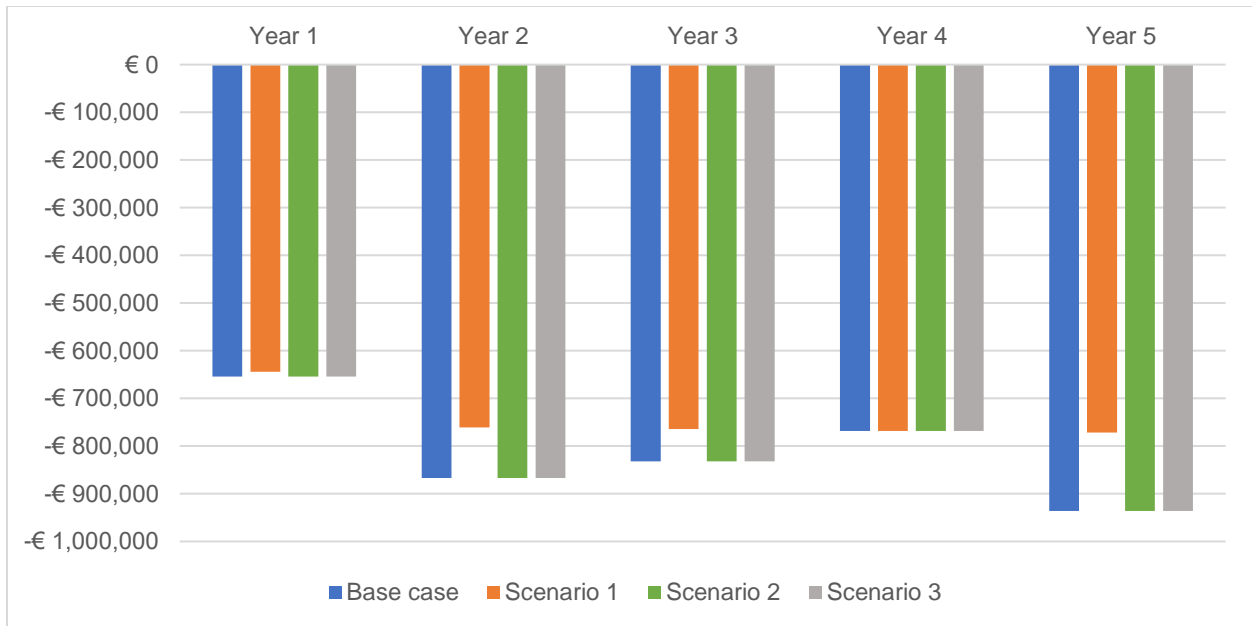

**Supplementary Figure 6:** Summary of net budget impact results for Herxuma : Base case and scenario 1-3 analyses for Spain

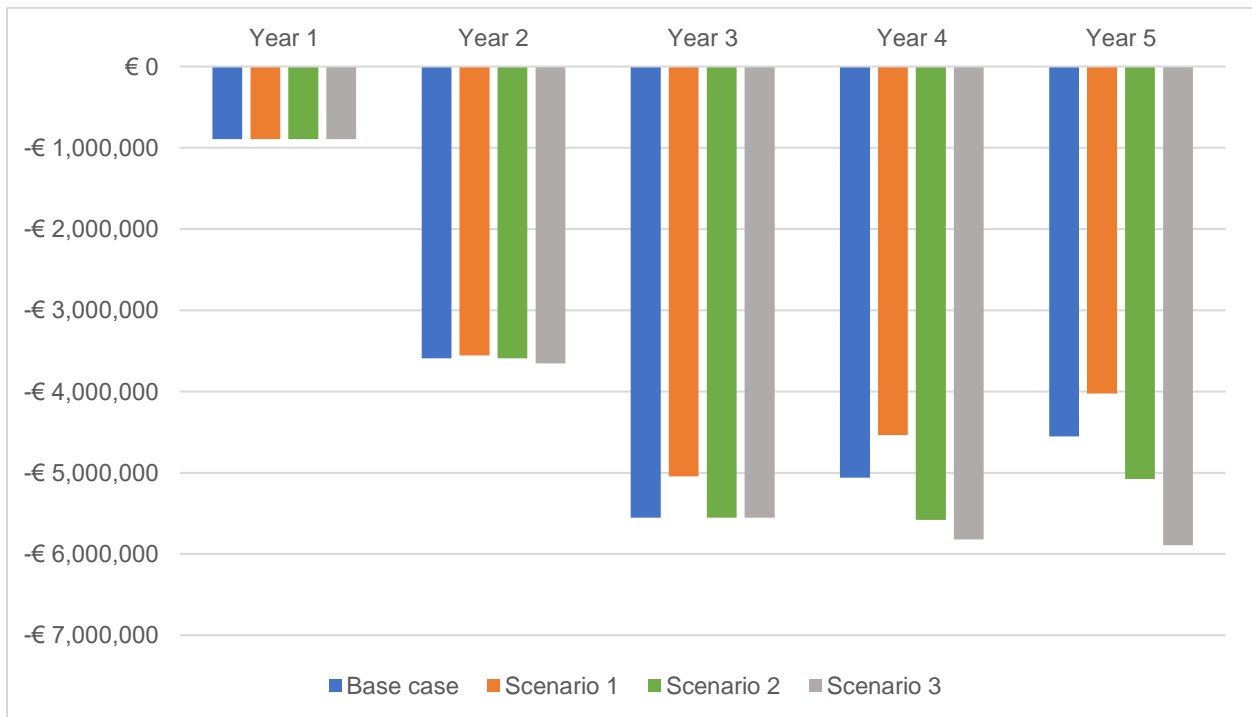

**Supplementary Figure 7:** Summary of net budget impact results for Truxima (200mg pack size): Base case and scenario 1-3 analyses for Italy

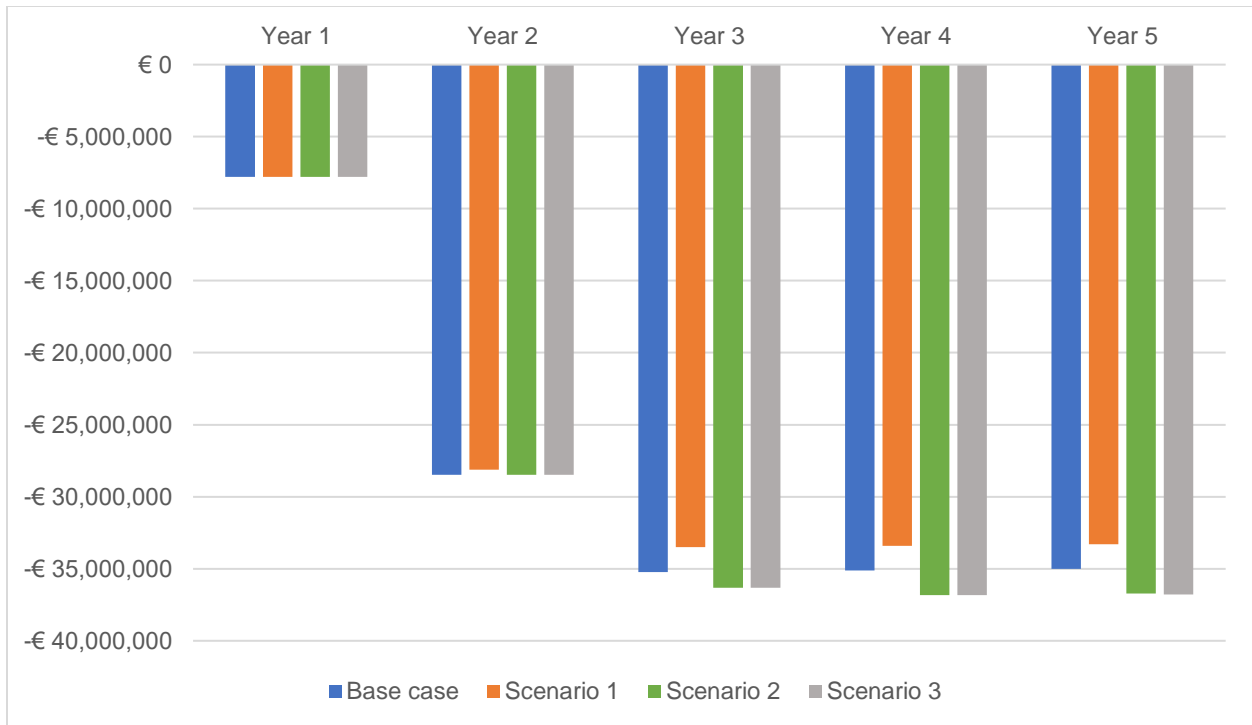

**Supplementary Figure 8:** Summary of net budget impact results for Herzuma : Base case and scenario 1-3 analyses for Italy

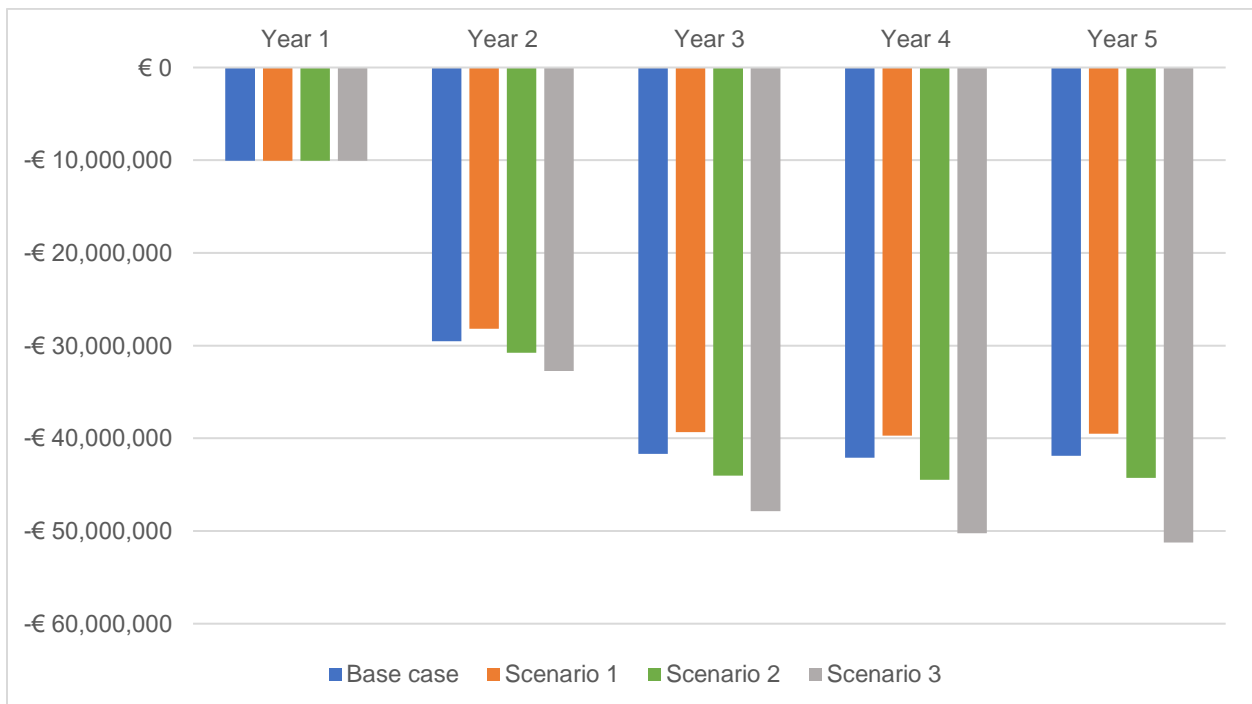



## 8. Sensitivity analysis

Supplementary Figure 9: Truxima OWSA tornado diagram for France

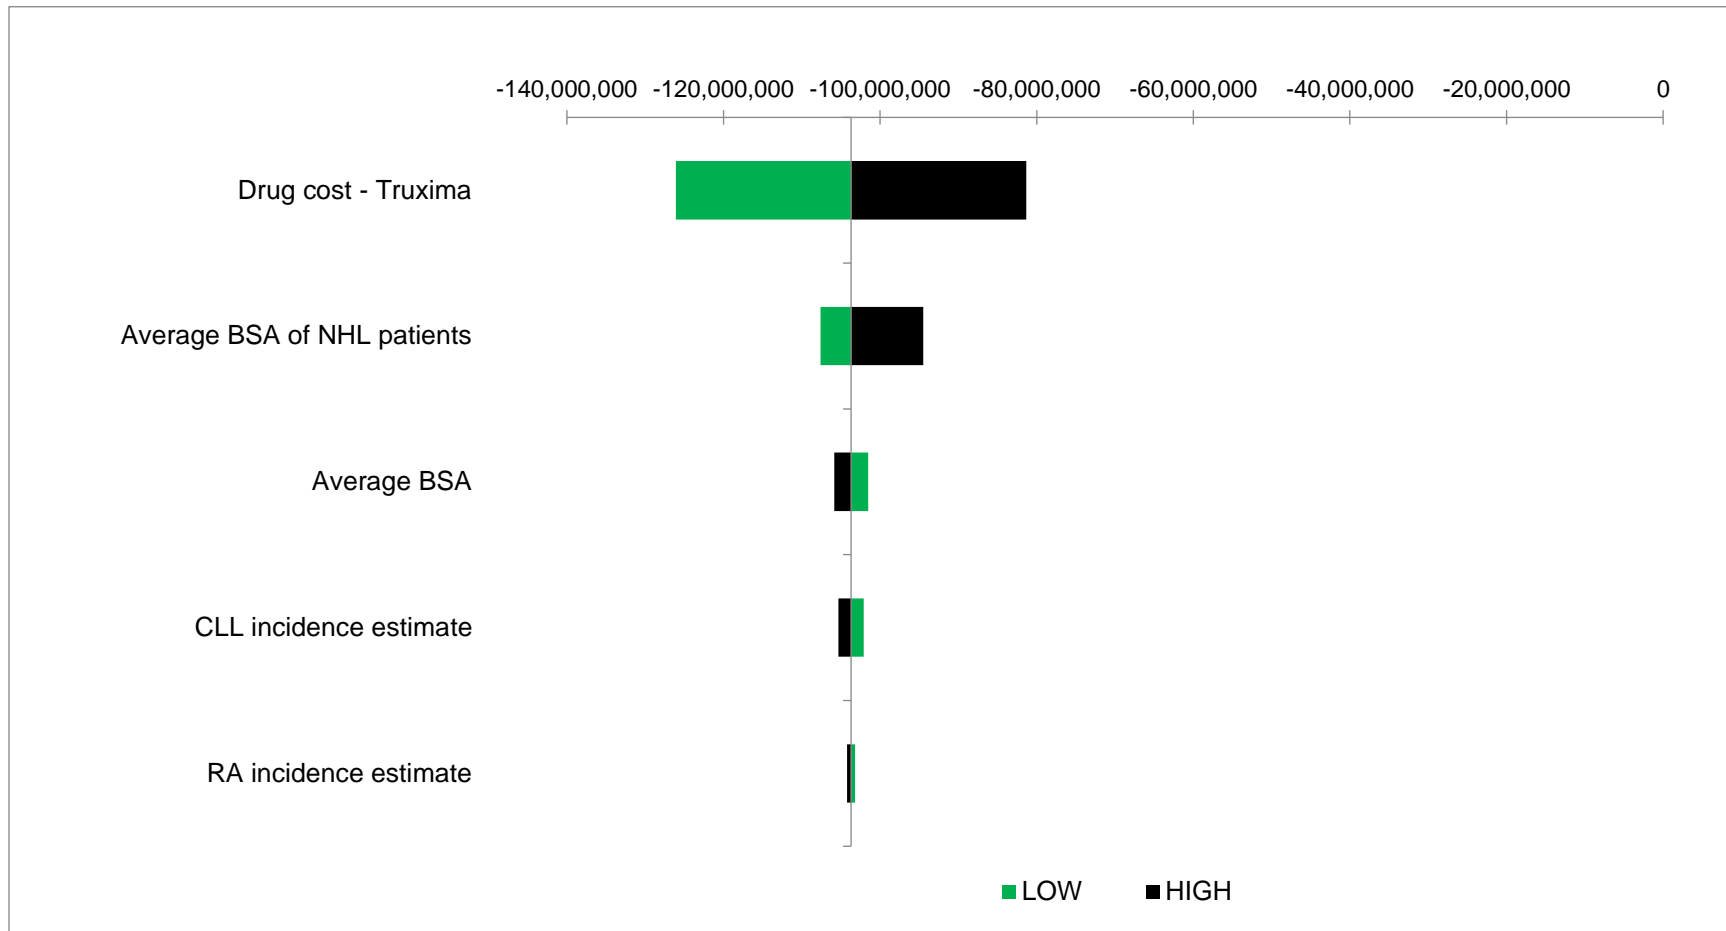

BSA: body surface area, CLL: chronic lymphocytic leukaemia, NHLd: Non-Hodgkin Lymphoma, diffuse, NHLf: Non-Hodgkin Lymphoma, follicular, OWSA: one-way sensitivity analysis, RA: rheumatoid arthritis

**Supplementary Figure 10:**Herzuma OWSA tornado diagram for France

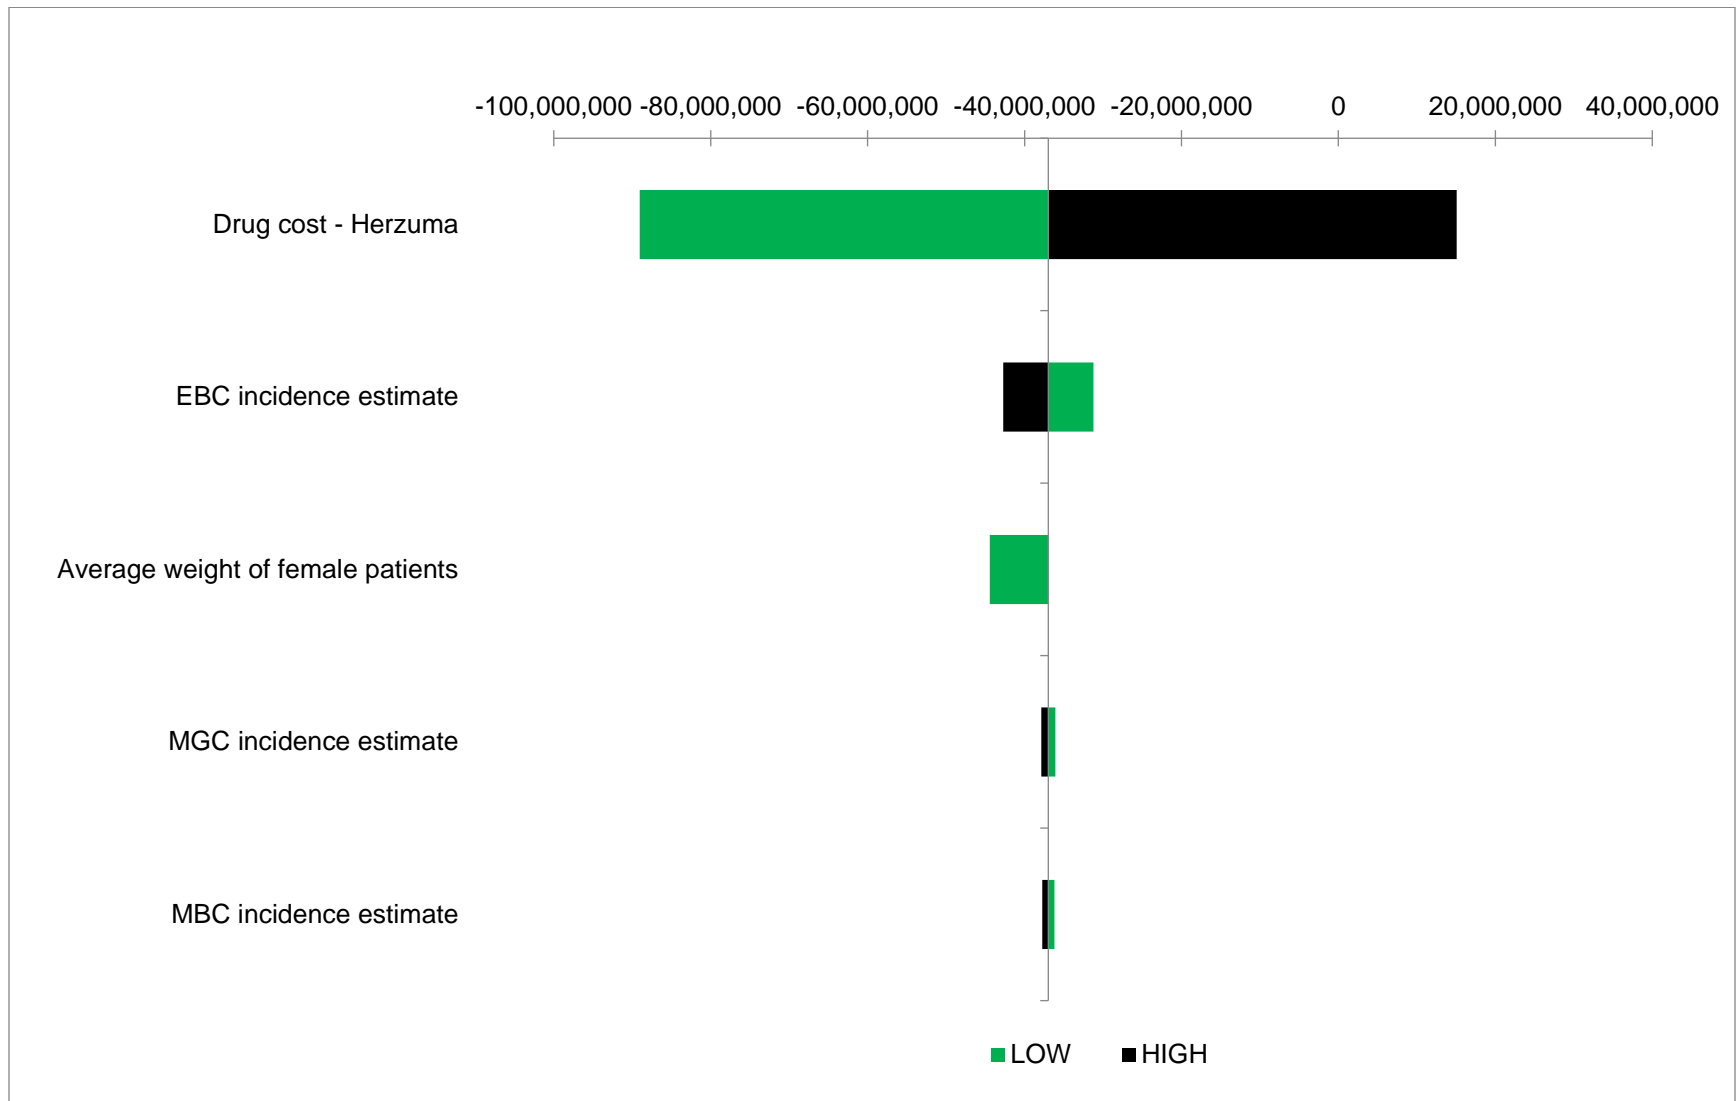

*EBC: early breast cancer, GPA: granulomatosis with polyangiitis, MBC: metastatic breast cancer, MGC: metastatic gastric cancer, OWSA: one-way sensitivity analysis*

**Supplementary Figure 11:** Truxima OWSA tornado diagram for Germany

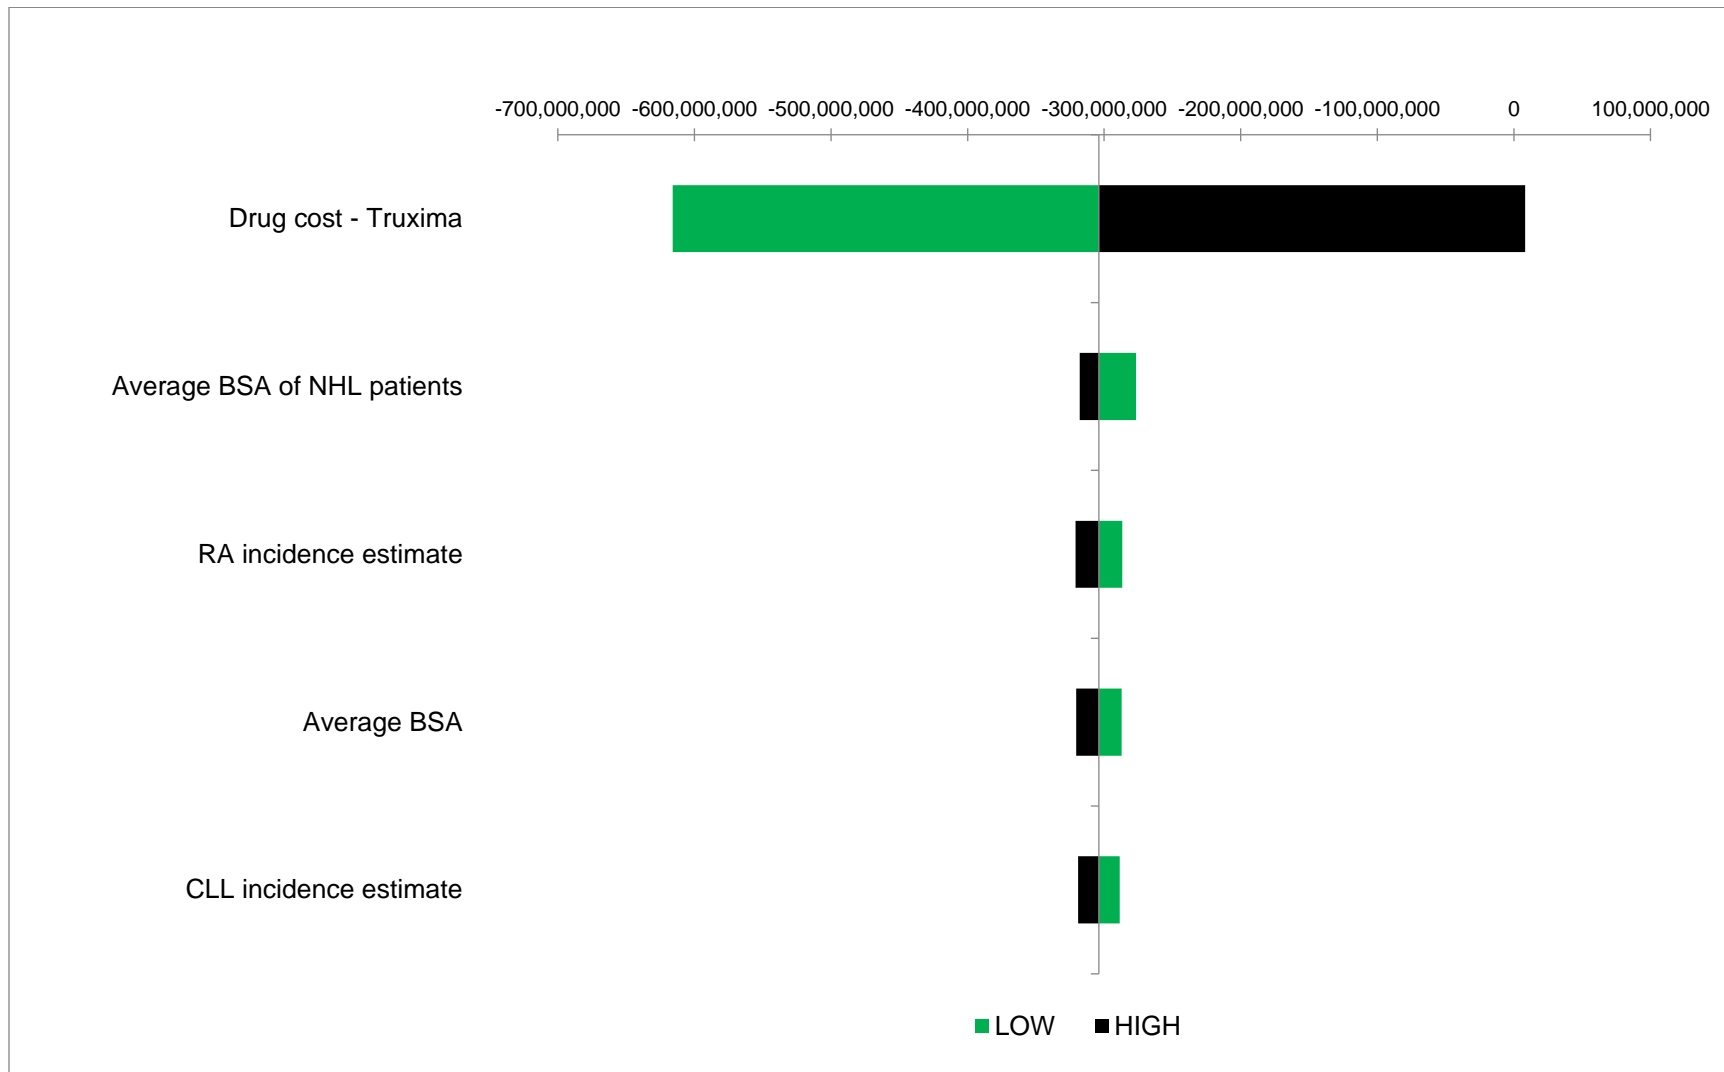

BSA: body surface area, CLL: chronic lymphocytic leukaemia, NHLd: Non-Hodgkin Lymphoma, diffuse, NHLf: Non-Hodgkin Lymphoma, follicular, OWSA: one-way sensitivity analysis, RA: rheumatoid arthritis

**Supplementary Figure 12:**Herzuma OWSA tornado diagram for Germany

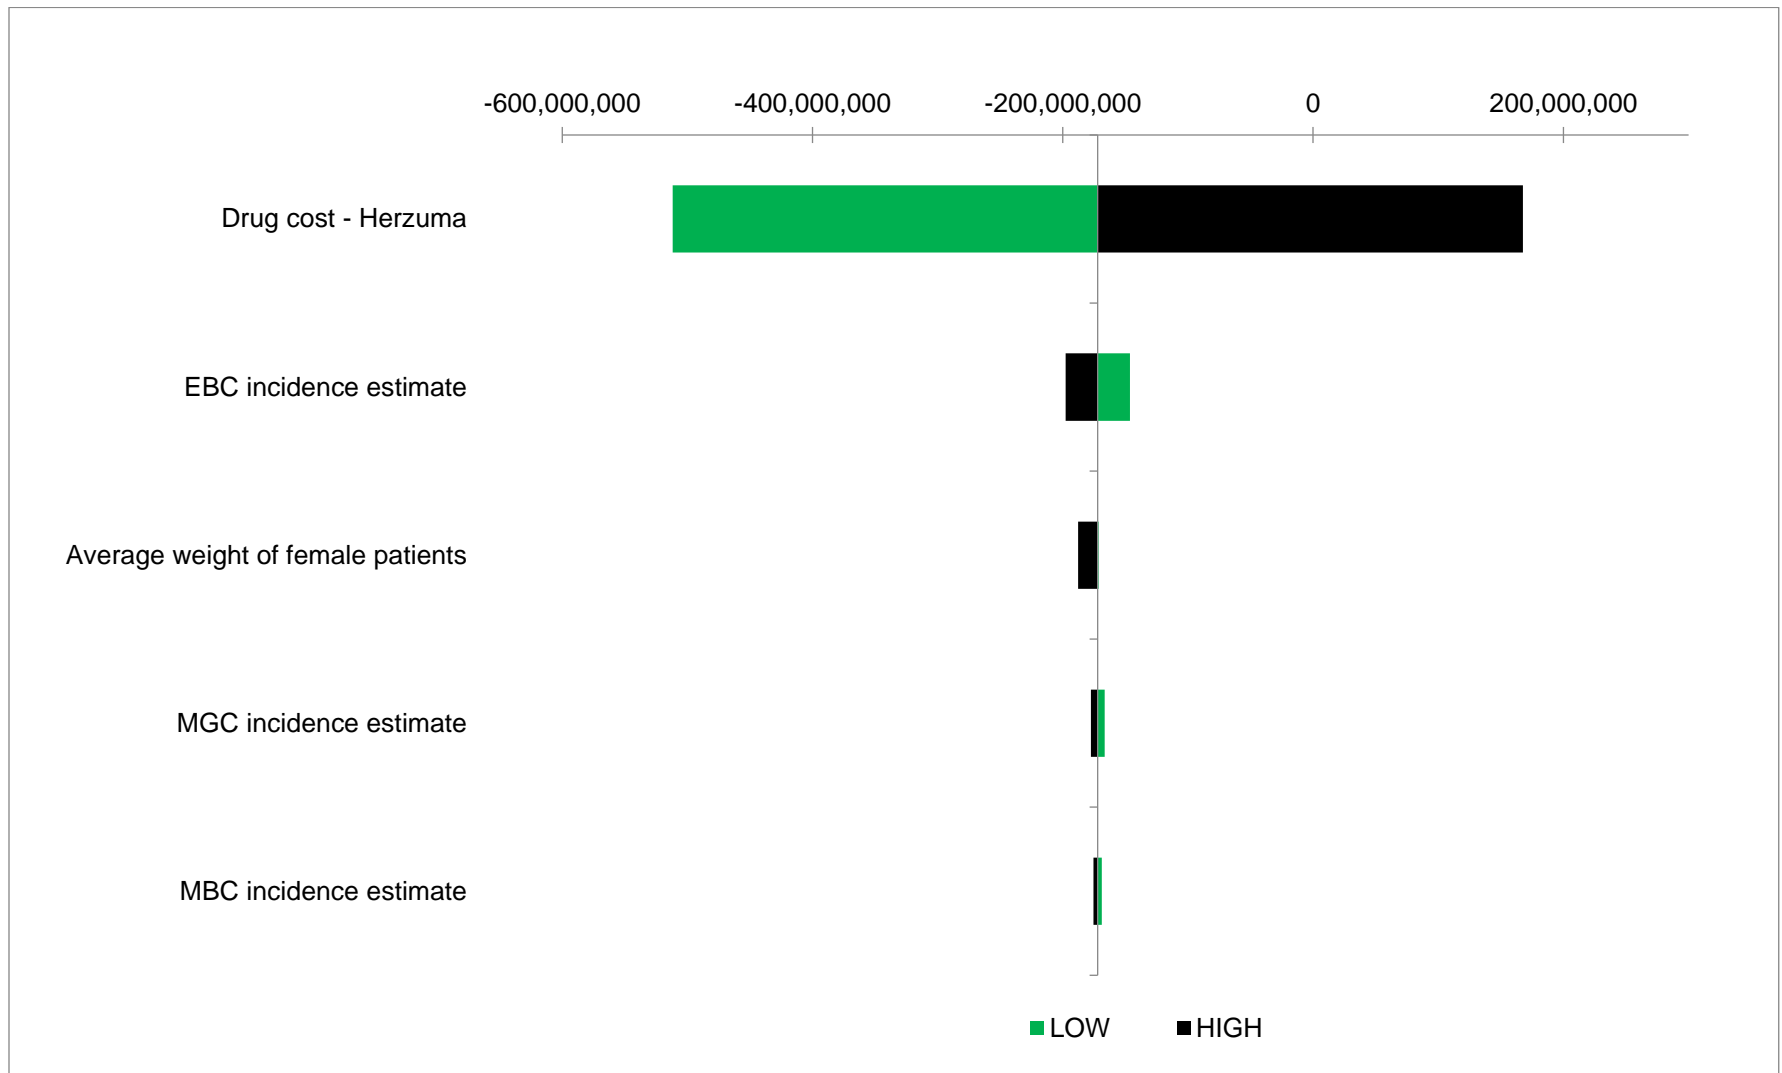

*EBC: early breast cancer, GPA: granulomatosis with polyangiitis, MBC: metastatic breast cancer, MGC: metastatic gastric cancer, OWSA: one-way sensitivity analysis*

**Supplementary Figure 13:** Truxima OWSA tornado diagram for Spain

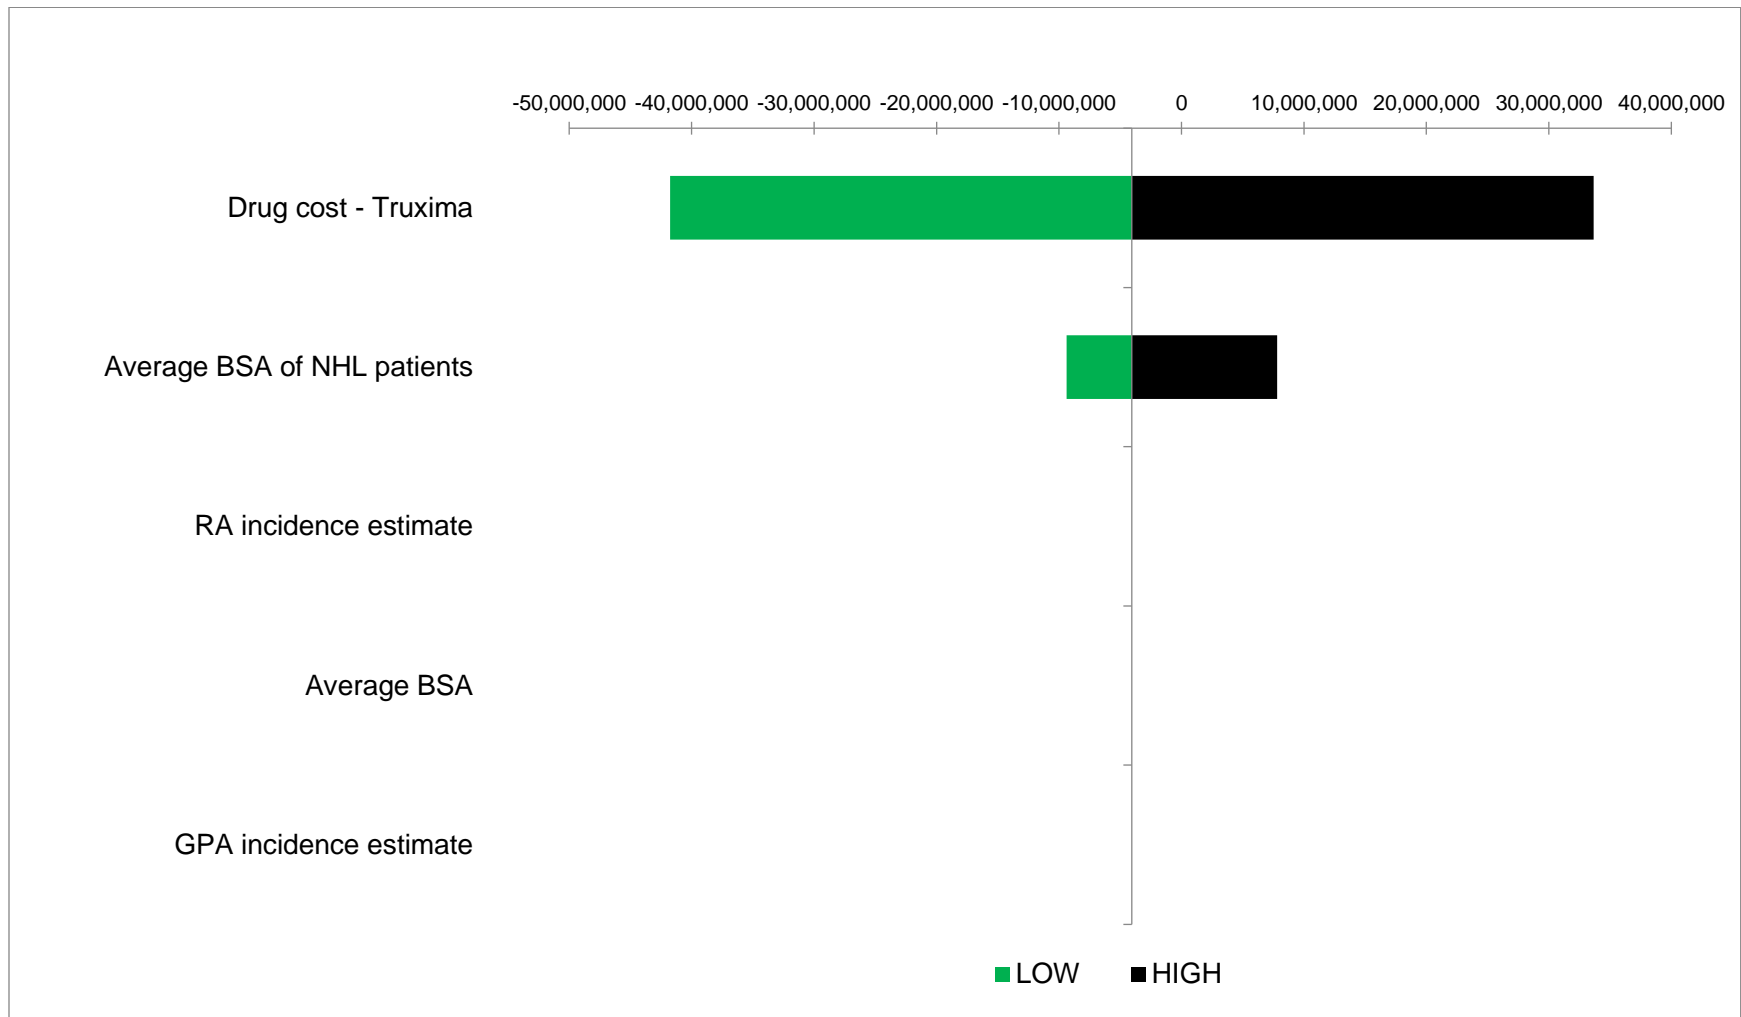

*BSA: body surface area, CLL: chronic lymphocytic leukaemia, NHLd: Non-Hodgkin Lymphoma, diffuse, NHLf: Non-Hodgkin Lymphoma, follicular, OWSA: one-way sensitivity analysis, RA: rheumatoid arthritis*

**Supplementary Figure 14:**Herzuma OWSA tornado diagram for Spain

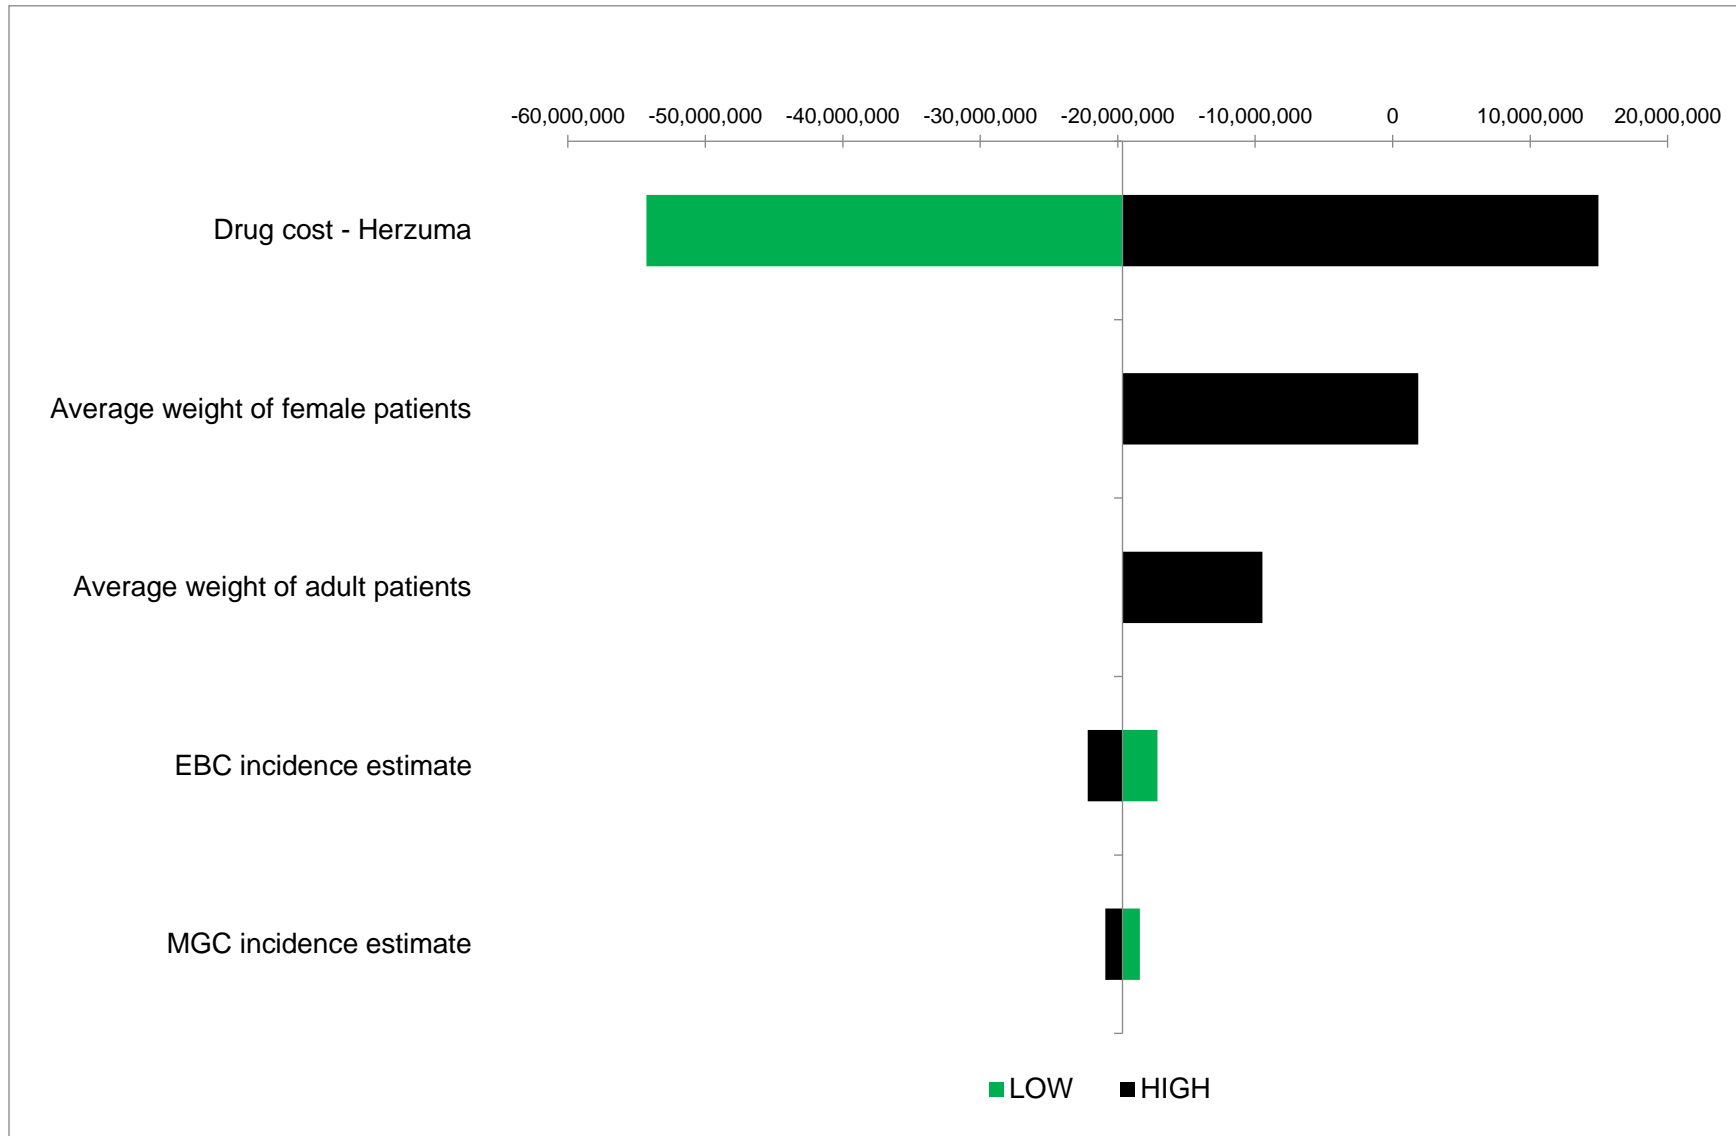

*EBC: early breast cancer, GPA: granulomatosis with polyangiitis, MBC: metastatic breast cancer, MGC: metastatic gastric cancer, OWSA: one-way sensitivity analysis*

**Supplementary Figure 15:** Truxima OWSA tornado diagram for Italy

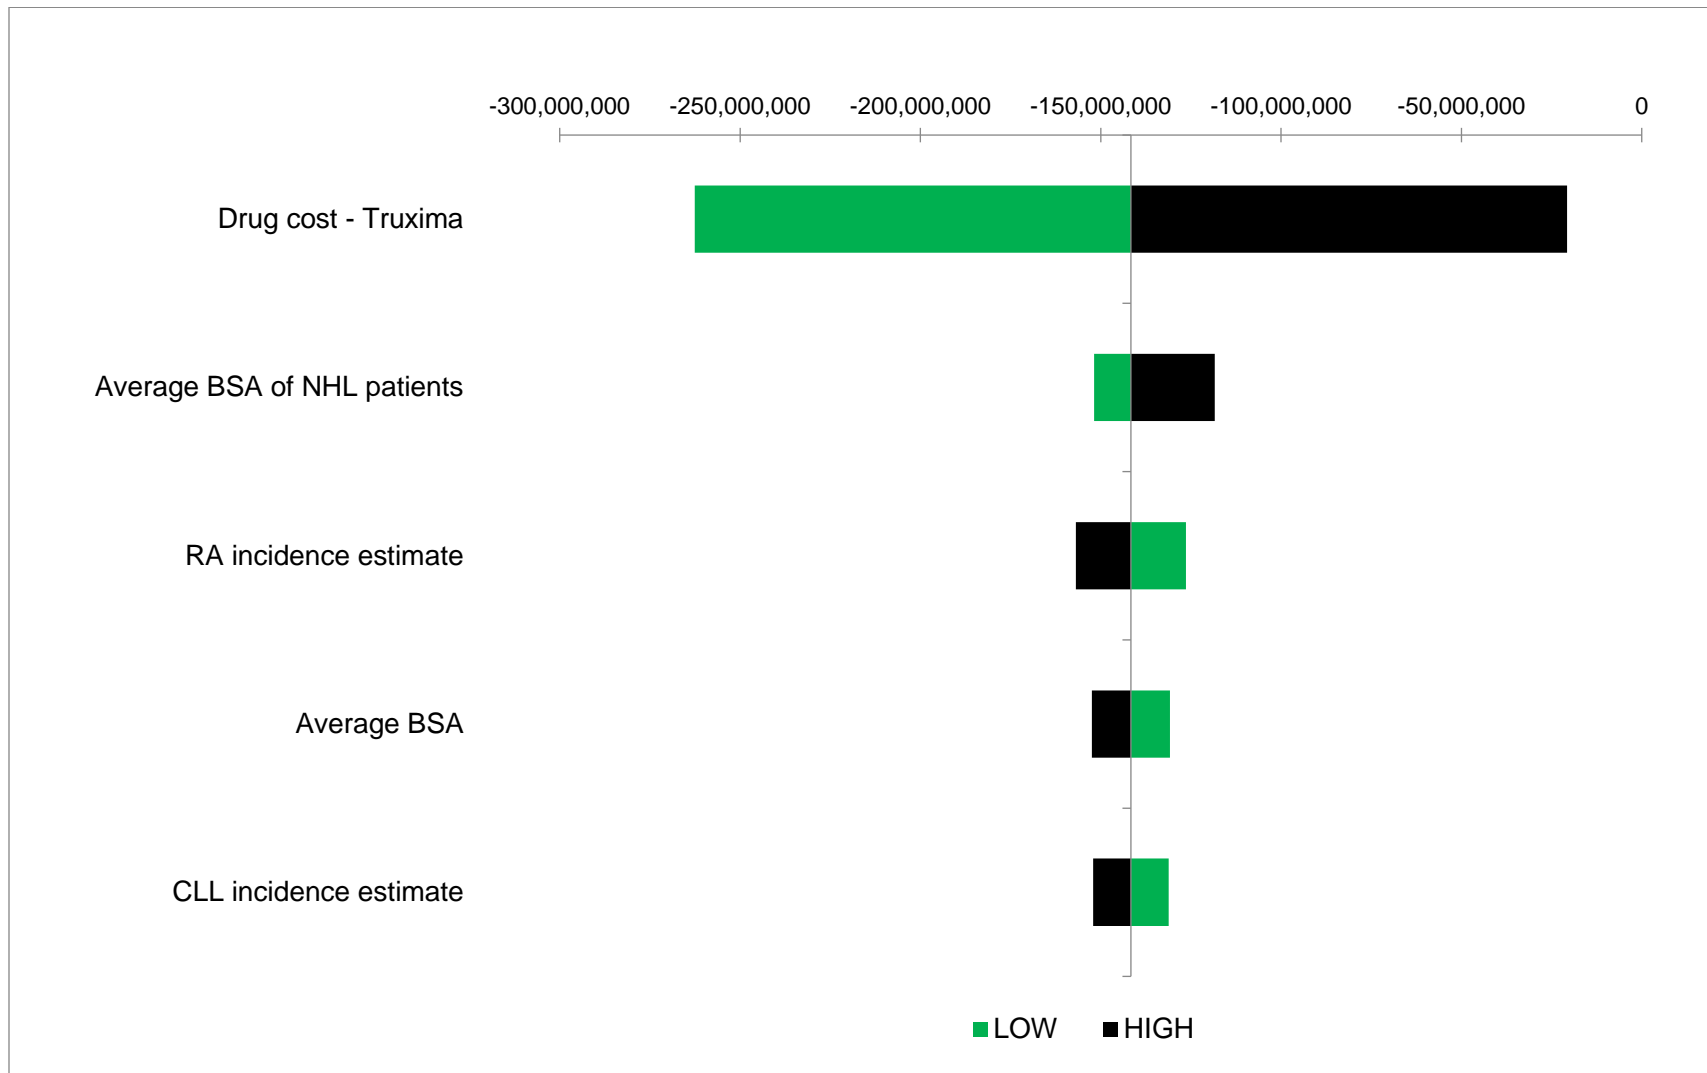

BSA: body surface area, CLL: chronic lymphocytic leukaemia, NHLd: Non-Hodgkin Lymphoma, diffuse, NHLf: Non-Hodgkin Lymphoma, follicular, OWSA: one-way sensitivity analysis, RA: rheumatoid arthritis

**Supplementary Figure 16:**Herzuma OWSA tornado diagram for Italy

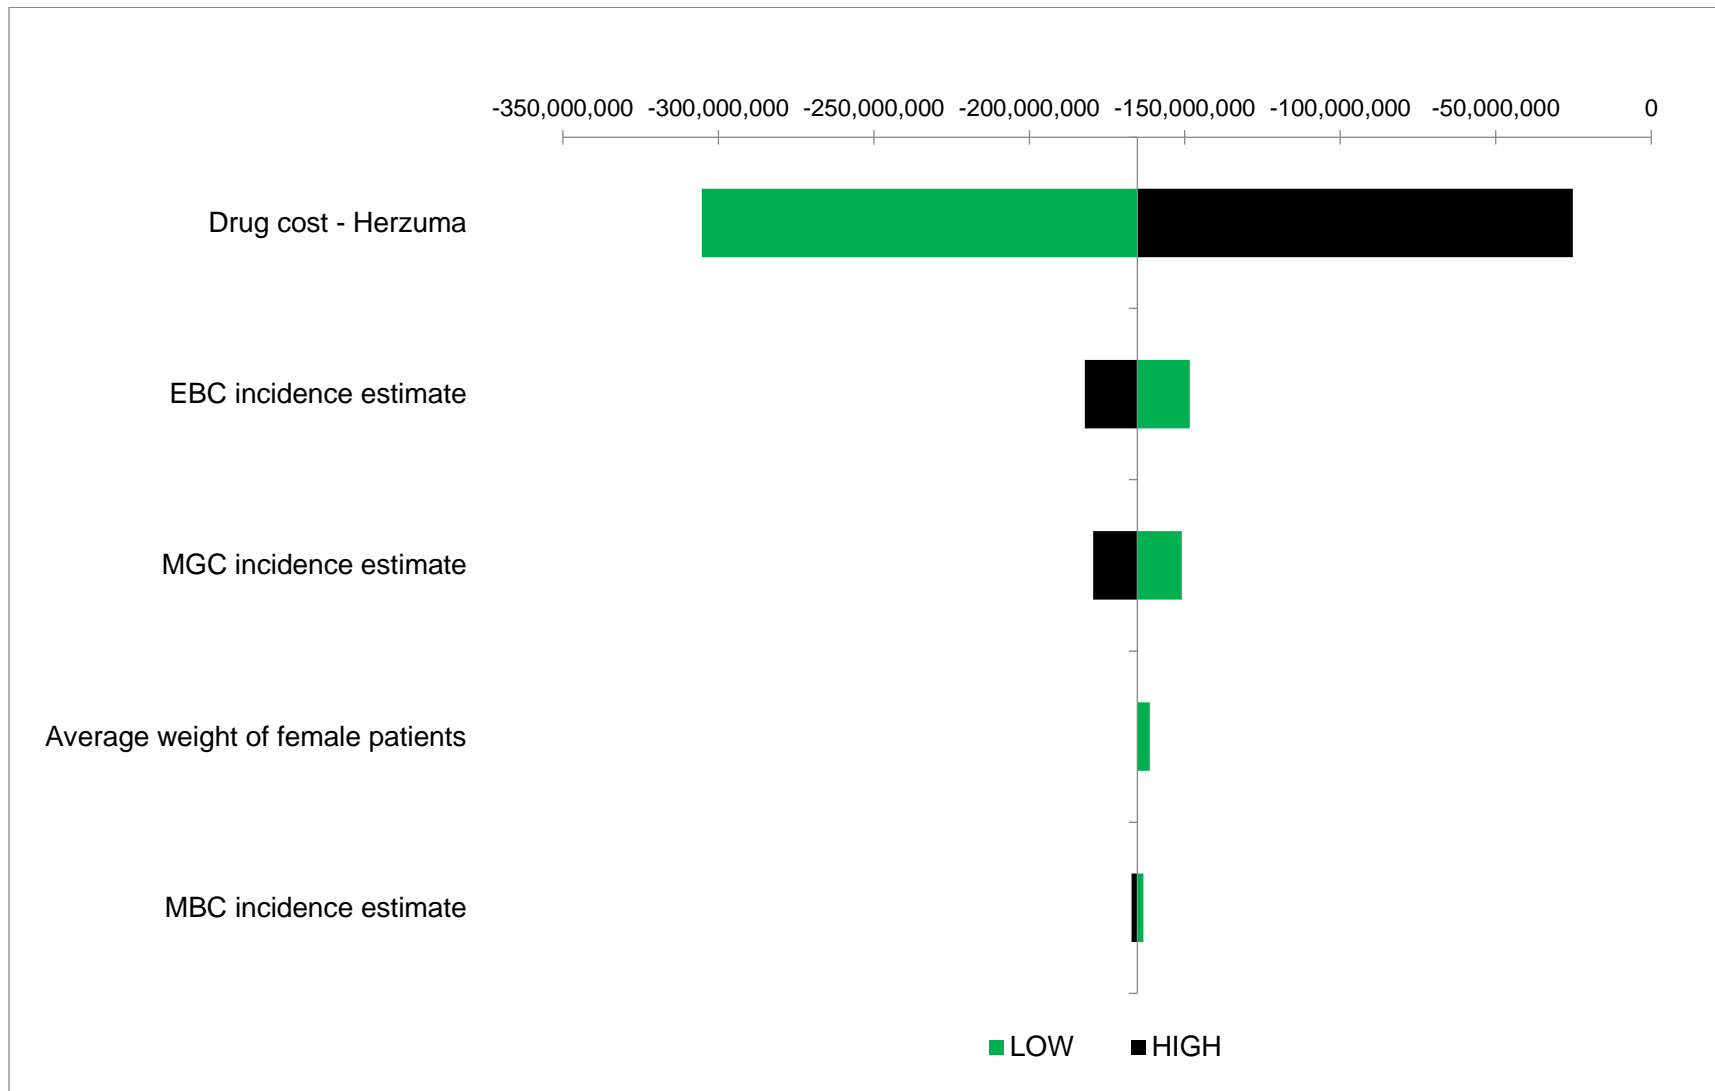

*EBC: early breast cancer, GPA: granulomatosis with polyangiitis, MBC: metastatic breast cancer, MGC: metastatic gastric cancer, OWSA: one-way sensitivity analysis*



**Supplementary Figure 17** Market volume share split between the reference drugs and biosimilars for trastuzumab in France

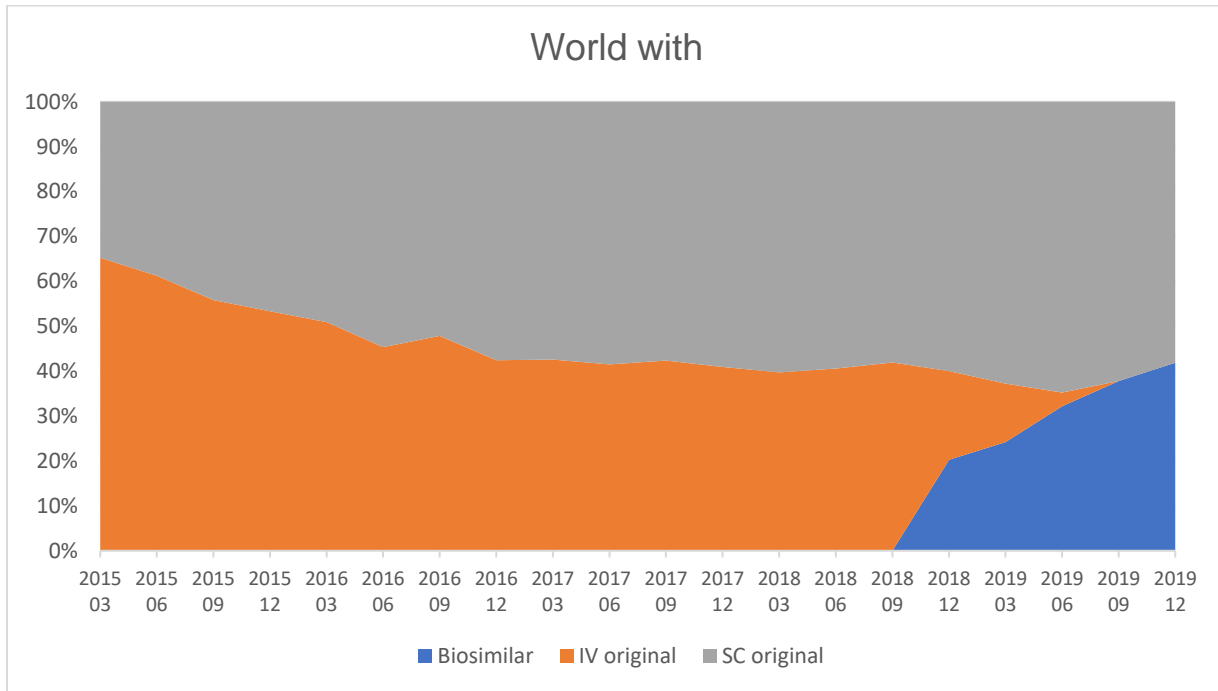

**Supplementary Figure 18** Market volume share split between the reference drugs and biosimilars for trastuzumab in Germany

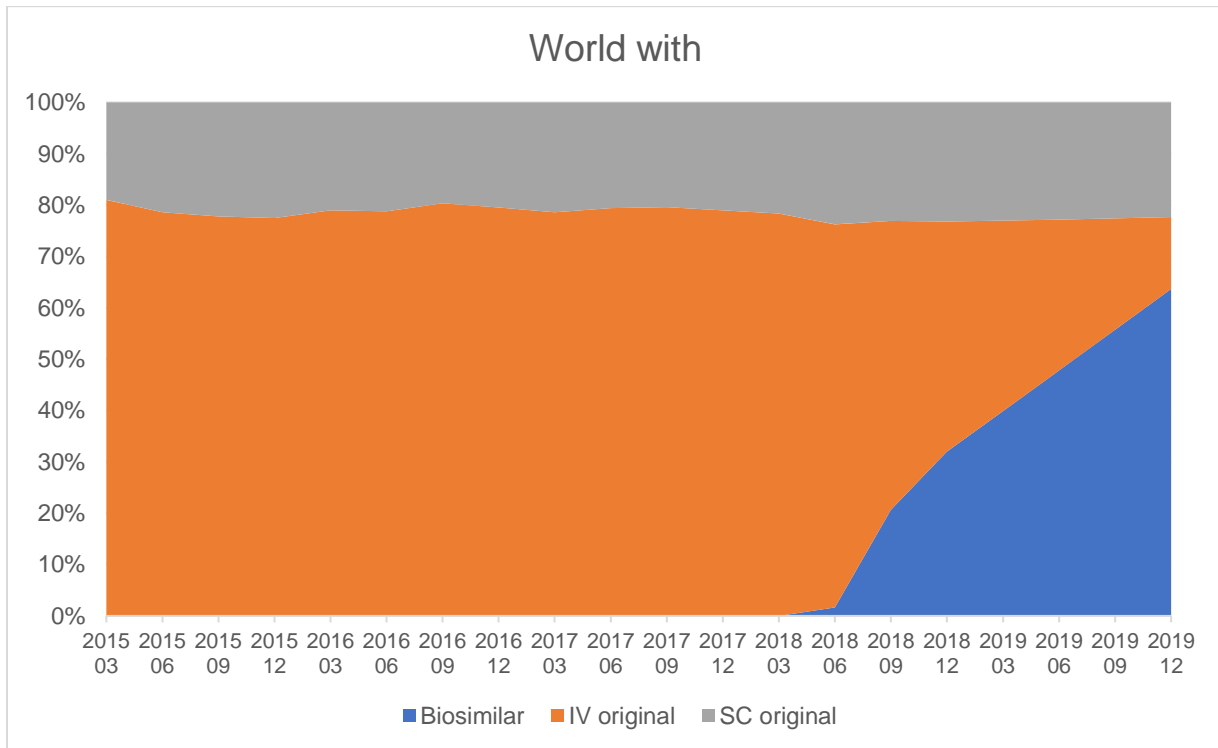

**Supplementary Figure 19** Market volume share split between the reference drugs and biosimilars for trastuzumab in Italy

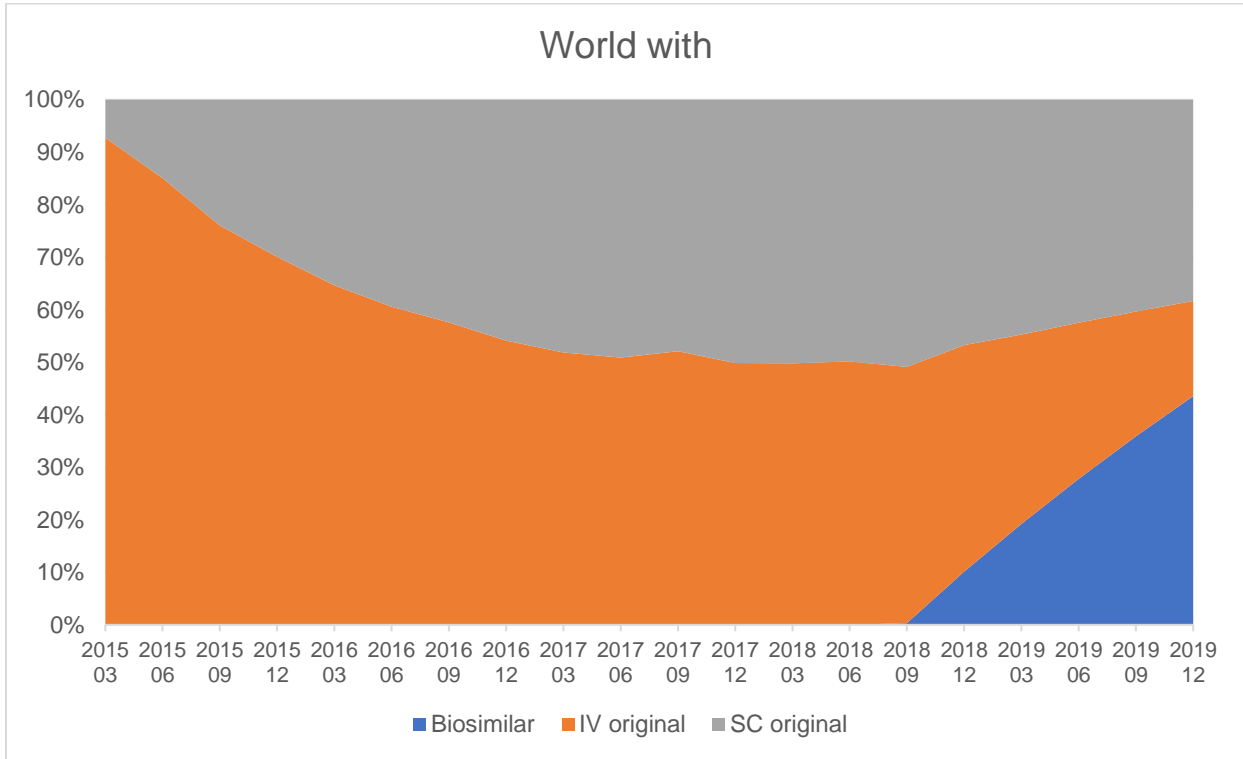

**Supplementary Figure 20** Market volume share split between the reference drugs and biosimilars for trastuzumab in Spain

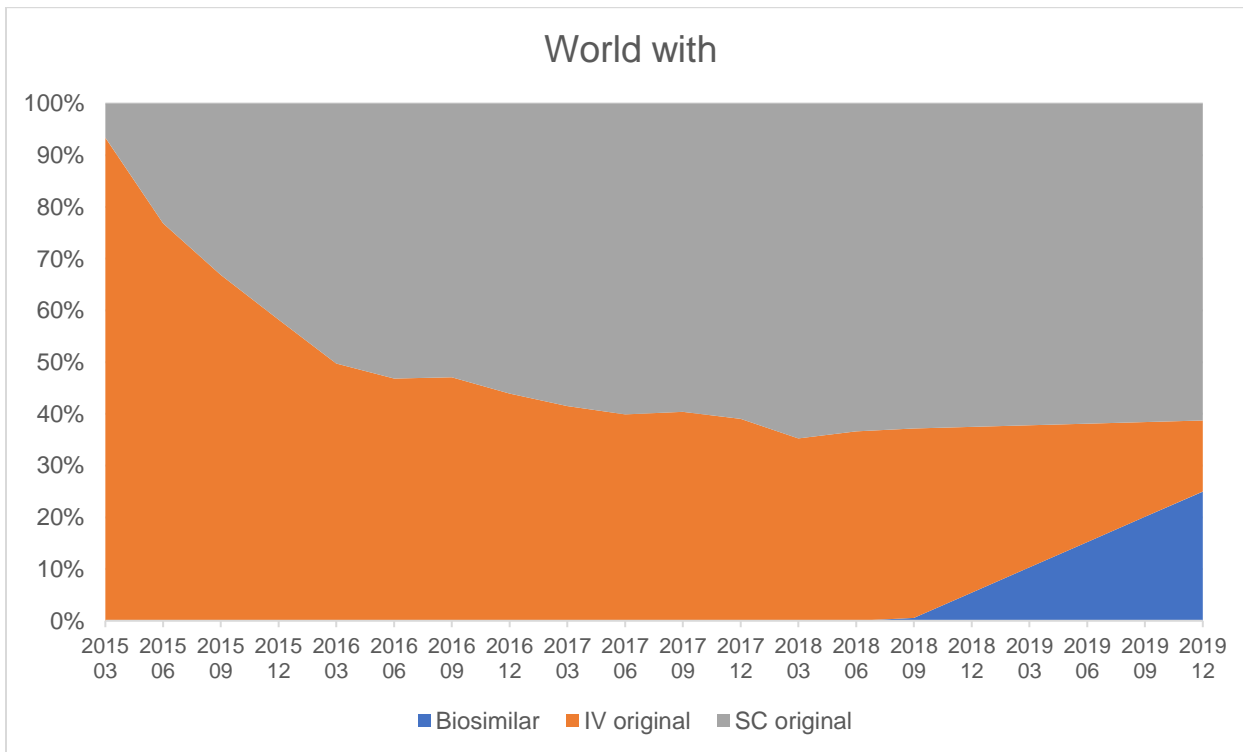

**Supplementary Figure 21** Market volume share split between the reference drugs and biosimilars for trastuzumab in the UK

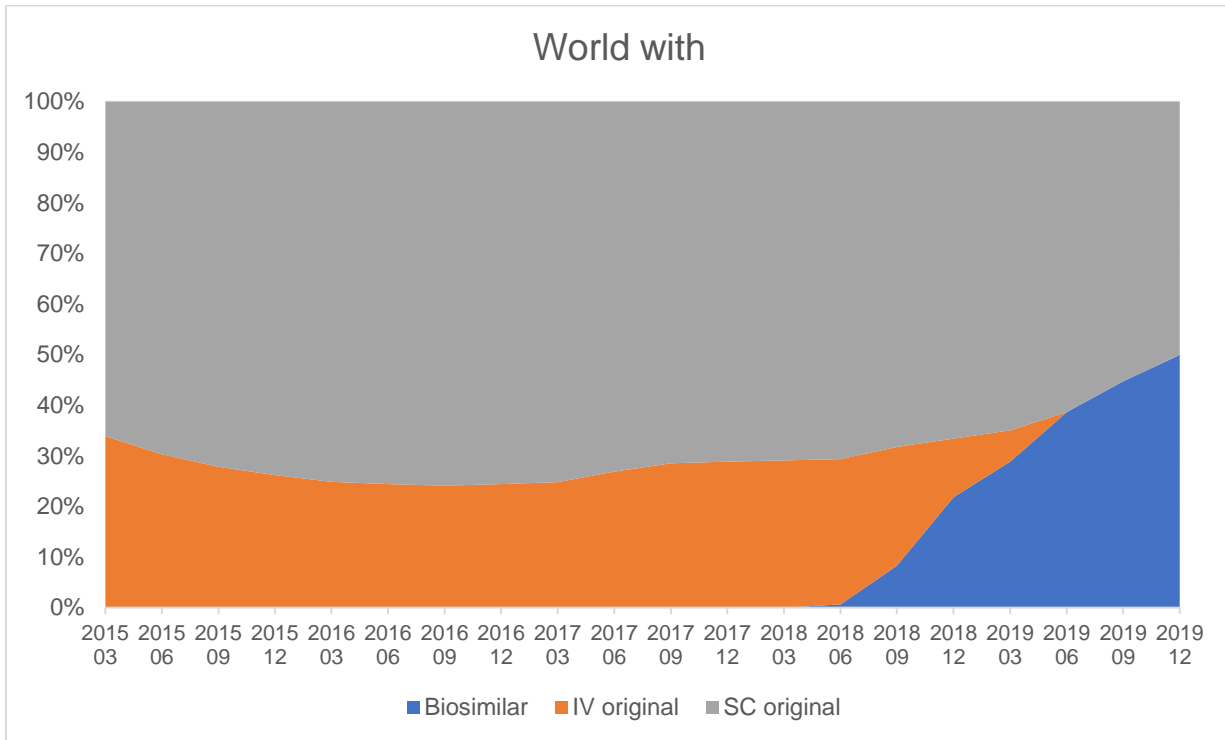

**Supplementary Figure 22** Market volume share split between the reference drugs and biosimilars for rituximab in France

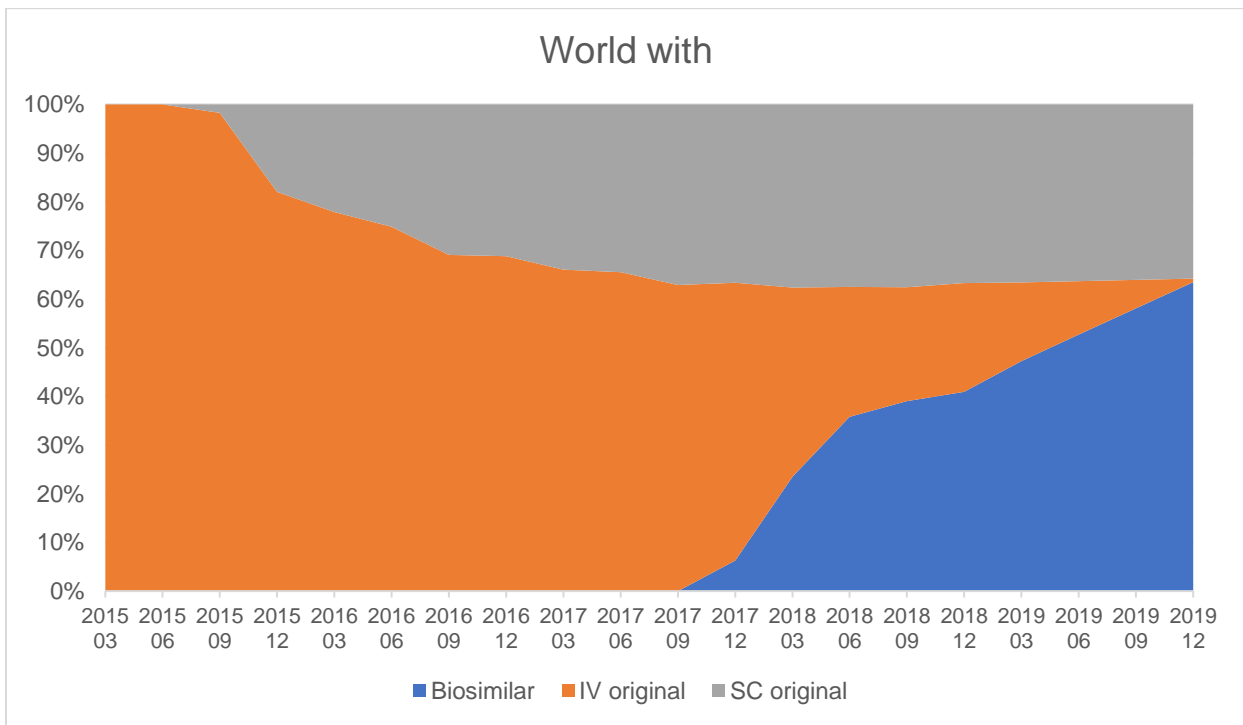

**Supplementary Figure 23** Market volume share split between the reference drugs and biosimilars for rituximab in Germany

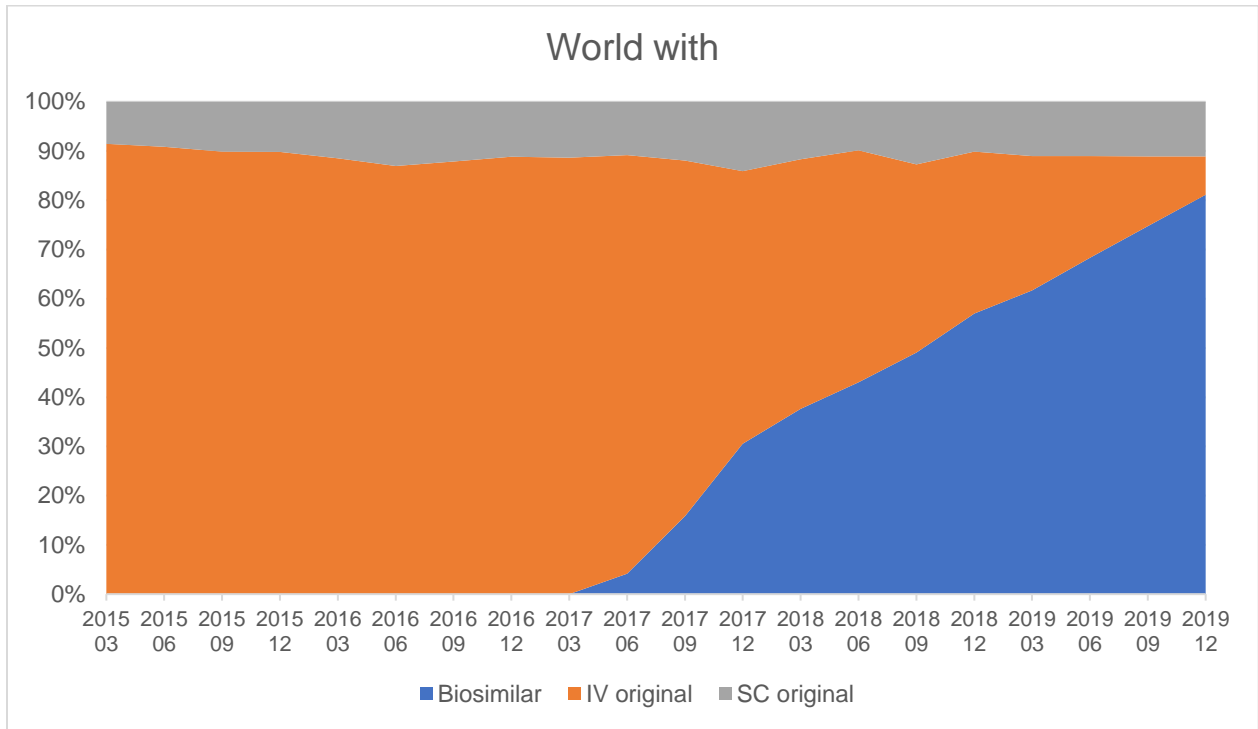

**Supplementary Figure 24** Market volume share split between the reference drugs and biosimilars for rituximab in Italy

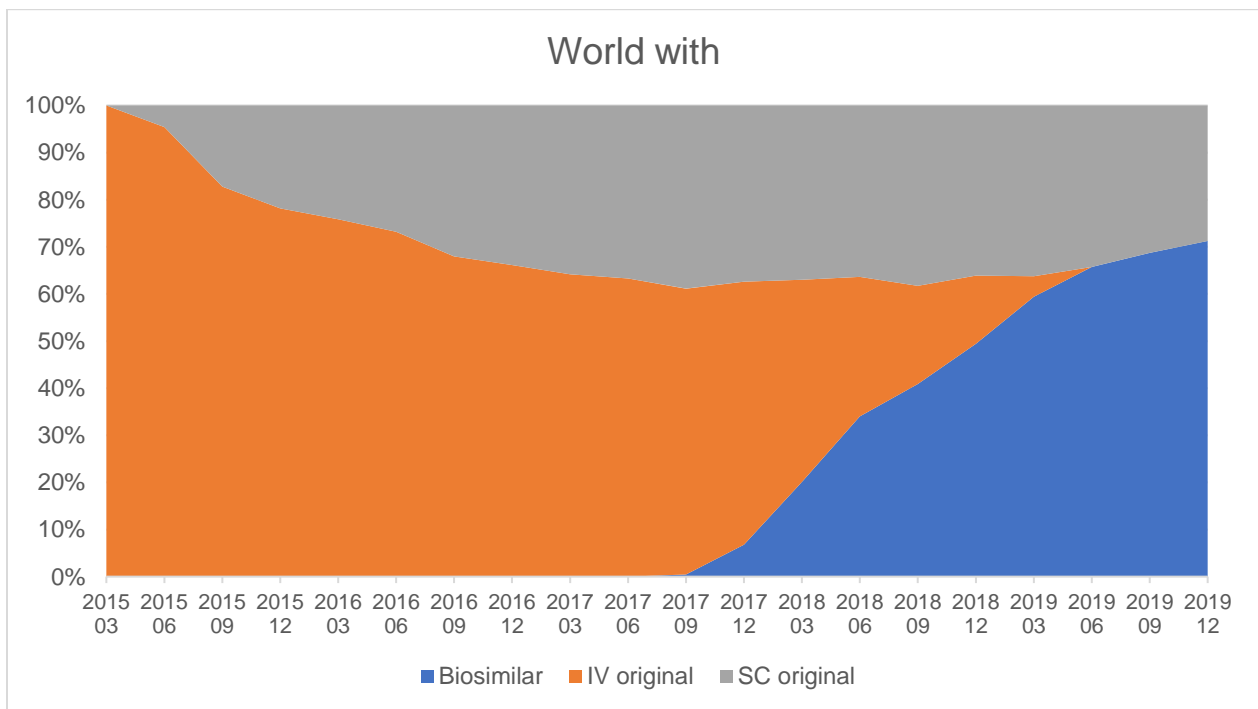

**Supplementary Figure 25** Market volume share split between the reference drugs and biosimilars for rituximab in Spain

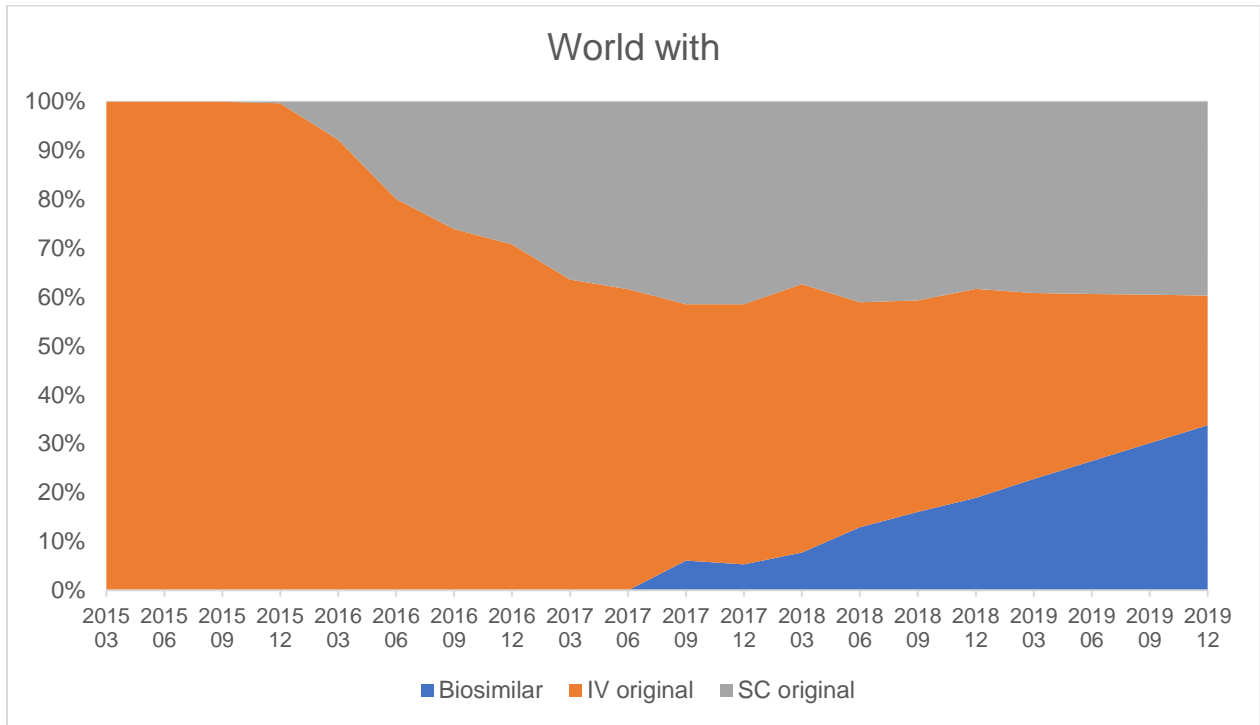

**Supplementary Figure 26** Market volume share split between the reference drugs and biosimilars for rituximab in Spain

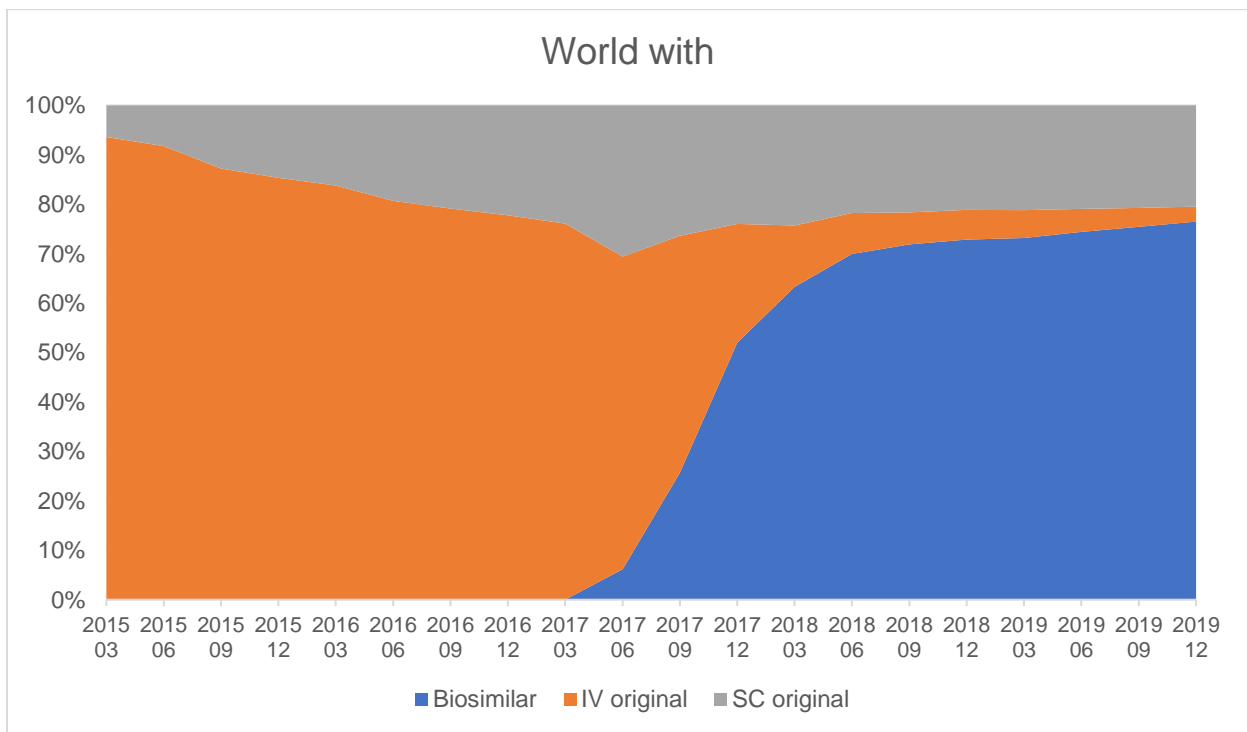

## References

1. Office for National Statistics. Overview of the UK Population - ONS [Internet]. 2015 [cited 2020 Nov 26]. Available from: <https://webarchive.nationalarchives.gov.uk/20160105223359/http://www.ons.gov.uk/ons/rel/pop-estimate/population-estimates-for-uk--england-and-wales--scotland-and-northern-ireland/mid-2014/sty---overview-of-the-uk-population.html>
2. Institut national de la statistique et des études économiques. Bilan démographique 2018 [Internet]. [cited 2020 Nov 26]. Available from: <https://www.insee.fr/fr/statistiques/1892086?sommaire=1912926>
3. Bevölkerung in Deutschland: 82,8 Millionen zum Jahresende 2017 [Internet]. Statistisches Bundesamt. [cited 2020 Nov 26]. Available from: [https://www.destatis.de/DE/Presse/Pressemitteilungen/2018/09/PD18\\_347\\_12411.html](https://www.destatis.de/DE/Presse/Pressemitteilungen/2018/09/PD18_347_12411.html)
4. Population totale par sexe et âge au 1er janvier 2020, France – Bilan démographique 2019 | Insee [Internet]. [cited 2020 Nov 26]. Available from: <https://www.insee.fr/fr/statistiques/1892086?sommaire=1912926>
5. Popolazione residente al 1° gennaio [Internet]. [cited 2020 Nov 26]. Available from: [http://dati.istat.it/Index.aspx?DataSetCode=DCIS\\_POPRES1#](http://dati.istat.it/Index.aspx?DataSetCode=DCIS_POPRES1#)
6. National Audit Office. Services for people with rheumatoid arthritis 2009 [Internet]. Available from: <https://www.nao.org.uk/wp-content/uploads/2009/07/0809823.pdf>
7. Haute Autorite de Sante. Polyarthrite rhumatoïde : aspects thérapeutiques hors médicaments et chirurgie - aspects médico-sociaux et organisationnels [Internet]. 2007 [cited 2020 Nov 26]. Available from: [https://www.has-sante.fr/upload/docs/application/pdf/argumentaire\\_pr\\_non\\_med\\_071018.pdf](https://www.has-sante.fr/upload/docs/application/pdf/argumentaire_pr_non_med_071018.pdf)
8. Versorgungsforschung in der Rheumatologie [Internet]. springermedizin.de. [cited 2020 Nov 26]. Available from: <https://www.springermedizin.de/versorgungsforschung-in-der-rheumatologie/8387376>
9. Carbonell J, Cobo T, Balsa A, Descalzo MA, Carmona L, SERAP Study Group. The incidence of rheumatoid arthritis in Spain: results from a nationwide primary care registry. *Rheumatology (Oxford)*. 2008;47:1088–92.
10. Benucci M, Cammelli E, Manfredi M, Saviola G, Baiardi P, Mannoni A, et al. Early rheumatoid arthritis in Italy: study of incidence based on a two-level strategy in a sub-area of Florence (Scandicci-Le Signe). *Rheumatol Int*. 2008;28:777–81.
11. Chronic lymphocytic leukaemia (CLL) incidence statistics [Internet]. Cancer Research UK. 2015 [cited 2020 Nov 26]. Available from: <https://www.cancerresearchuk.org/health-professional/cancer-statistics/statistics-by-cancer-type/leukaemia-cll/incidence>
12. Monnereau A RL, Maynadié M, Binder-Foucard F, Belot A, Troussard X, Bossard N. Estimation nationale de l'incidence des cancers en France entre 1980 et 2012. 2013.
13. Robert Koch Institut. Krebs in Deutschland für 2013-2014 [Internet]. Available from: <https://www.kup.at/kup/pdf/8742.pdf>

14. Solans M, Osca-Gelis G, Comas R, Roncero JM, Gallardo D, Marcos-Gragera R, et al. Challenges in assessing the real incidence of chronic lymphocytic leukemia: 16 years of epidemiological data from the province of Girona, Spain. *Cancer Causes Control*. 2018;29:379–82.
15. Salvi G. CHRONIC LYMPHOCYTIC LEUKAEMIA: CENSUS OF PATIENTS TREATED IN ITALIAN HAEMATOLOGY UNITS. *Mediterr J Hematol Infect Dis*. 2015;7:e2015056–e2015056.
16. Watts RA, Al-Taiar A, Scott DGI, Macgregor AJ. Prevalence and incidence of Wegener’s granulomatosis in the UK general practice research database. *Arthritis Rheum*. 2009;61:1412–6.
17. Haute Autorite de Sante. MABTHERA 100 mg, solution à diluer pour perfusion Conditionnement B/2 (CIP : 34009 560 600 3 0) MABTHERA 500 mg, solution à diluer pour perfusion Conditionnement B/1 (CIP : 34009 560 602 6 9) [Internet]. 2015 [cited 2020 Nov 26]. Available from: [https://www.has-sante.fr/upload/docs/evamed/CT-13904\\_MABTHERA\\_PIC\\_EI\\_vascularite\\_Avis2\\_CT13904.pdf](https://www.has-sante.fr/upload/docs/evamed/CT-13904_MABTHERA_PIC_EI_vascularite_Avis2_CT13904.pdf)
18. Claus Kroegel. *Klinische Pneumologie: Das Referenzwerk für Klinik und Praxis*. 2013.
19. Catanoso M, Macchioni P, Boiardi L, Manenti L, Tumiati B, Cavazza A, et al. Epidemiology of granulomatosis with polyangiitis (Wegener’s granulomatosis) in Northern Italy: a 15-year population-based study. *Semin Arthritis Rheum*. 2014;44:202–7.
20. Catanoso M, Macchioni P, Boiardi L, Manenti L, Tumiati B, Cavazza A, et al. Epidemiology of granulomatosis with polyangiitis (Wegener’s granulomatosis) in Northern Italy: a 15-year population-based study. *Semin Arthritis Rheum*. 2014;44:202–7.
21. Chung SA, Seo P. Microscopic Polyangiitis. *Rheumatic Disease Clinics*. Elsevier; 2010;36:545–58.
22. Orphanet: Microscopic polyangiitis [Internet]. [cited 2020 Nov 26]. Available from: [https://www.orpha.net/consor/cgi-bin/Disease\\_Search.php?lng=IT&data\\_id=753&Disease\(s\)/group%20of%20diseases=Microscopic-polyangiitis&title=Microscopic-polyangiitis&search=Disease\\_Search\\_Simple](https://www.orpha.net/consor/cgi-bin/Disease_Search.php?lng=IT&data_id=753&Disease(s)/group%20of%20diseases=Microscopic-polyangiitis&title=Microscopic-polyangiitis&search=Disease_Search_Simple)
23. National Institute for Health and Care Excellence. Rituximab for the treatment of recurrent or refractory stage III or IV follicular non-Hodgkin’s lymphoma (Review of TA 37) [Internet]. 2002 [cited 2020 Nov 26]. Available from: <https://www.nice.org.uk/guidance/ta137/documents/follicular-lymphoma-rituximab-final-scope2>
24. Cancer today [Internet]. [cited 2020 Nov 26]. Available from: <http://gco.iarc.fr/today/home>
25. Cancer registration statistics, England - Office for National Statistics [Internet]. [cited 2020 Nov 26]. Available from: <https://www.ons.gov.uk/peoplepopulationandcommunity/healthandsocialcare/conditionsanddiseases/bulletins/cancerregistrationstatisticsengland/2016>
26. Quelques chiffres - Cancer du sein [Internet]. [cited 2020 Nov 26]. Available from: <https://www.e-cancer.fr/Patients-et-proches/Les-cancers/Cancer-du-sein/Quelques-chiffres>
27. Robert Koch Institut. Bericht zum Krebsgeschehen in Deutschland [Internet]. 2016 [cited 2020 Nov 26]. Available from:

[https://www.krebsdaten.de/Krebs/DE/Content/Publikationen/Krebsgeschehen/Krebsgeschehen\\_node.html](https://www.krebsdaten.de/Krebs/DE/Content/Publikationen/Krebsgeschehen/Krebsgeschehen_node.html)

28. J G, A A, M C, A M, Jr Q, D R, et al. Cancer incidence in Spain, 2015. *Clin Transl Oncol*. 2017;19:799–825.

29. Baeyens-Fernández JA, Molina-Portillo E, Pollán M, Rodríguez-Barranco M, Del Moral R, Arribas-Mir L, et al. Trends in incidence, mortality and survival in women with breast cancer from 1985 to 2012 in Granada, Spain: a population-based study. *BMC Cancer* [Internet]. 2018 [cited 2020 Nov 26];18. Available from: <https://www.ncbi.nlm.nih.gov/pmc/articles/PMC6090958/>

30. Cancro del seno e della tiroide: un legame stretto | Associazione Italiana Registri Tumori [Internet]. [cited 2020 Nov 26]. Available from: <https://www.registri-tumori.it/cms/contenuto/cancro-del-seno-e-della-tiroide-un-legame-stretto>

31. Haute Autorite de Sante. trastuzumab [Internet]. 2016 [cited 2020 Nov 26]. Available from: [https://www.has-sante.fr/upload/docs/evamed/CT-14877\\_HERCEPTIN\\_PIC\\_REEV\\_Avis2\\_CT14877.pdf](https://www.has-sante.fr/upload/docs/evamed/CT-14877_HERCEPTIN_PIC_REEV_Avis2_CT14877.pdf)

32. Aragonés N, Izarzugaza MI, Ramos M, Chirlaque MD, Almar E, Martínez C. Trends in oesophago-gastric cancer incidence in Spain: analysis by subsite and histology. *Annals of Oncology*. 2010;21:iii69–75.

33. National Health Service. Upadacitinib for adults with moderate to severe active rheumatoid arthritis after conventional synthetic disease-modifying anti-rheumatic drugs (DMARDs) or biologic DMARDs failure. 2017 p. 15.

34. MabThera 1400 mg Solution for Subcutaneous Injection - Summary of Product Characteristics (SmPC) - (emc) [Internet]. [cited 2020 Nov 26]. Available from: <https://www.medicines.org.uk/emc/product/5333/smpc>

35. MabThera 100 mg Concentrate for Solution for Infusion - Summary of Product Characteristics (SmPC) - (emc) [Internet]. [cited 2020 Nov 26]. Available from: <https://www.medicines.org.uk/emc/product/3801/smpc>

36. Georgi A, Aringer M. Therapiemöglichkeiten nach Nichtansprechen von TNF-Blockern bei rheumatoider Arthritis. :8.

37. Non-Hodgkin lymphoma incidence statistics [Internet]. Cancer Research UK. 2015 [cited 2020 Nov 26]. Available from: <https://www.cancerresearchuk.org/health-professional/cancer-statistics/statistics-by-cancer-type/non-hodgkin-lymphoma/incidence>

38. Federal Joint Committee (G-BA). Obinutuzumab (Gazyvaro®) [Internet]. 2013 [cited 2020 Nov 26]. Available from: [https://www.g-ba.de/downloads/92-975-1561/2016-06-13\\_Modul3\\_Obinutuzumab.pdf](https://www.g-ba.de/downloads/92-975-1561/2016-06-13_Modul3_Obinutuzumab.pdf)

39. Herceptin 150mg Powder for concentrate for solution for infusion - Summary of Product Characteristics (SmPC) - (emc) [Internet]. [cited 2020 Nov 26]. Available from: <https://www.medicines.org.uk/emc/product/3856/smpc>



40. MabThera 1400 mg Solution for Subcutaneous Injection - Summary of Product Characteristics (SmPC) - (emc) [Internet]. [cited 2020 Nov 26]. Available from: <https://www.medicines.org.uk/emc/product/5333/smpc>
41. Documents | Pertuzumab for adjuvant treatment of HER2-positive early stage breast cancer | Guidance | NICE [Internet]. NICE; [cited 2020 Nov 26]. Available from: <https://www.nice.org.uk/guidance/ta569/history>
42. Wolff AC, Hammond MEH, Schwartz JN, Hagerty KL, Allred DC, Cote RJ, et al. American Society of Clinical Oncology/College of American Pathologists guideline recommendations for human epidermal growth factor receptor 2 testing in breast cancer. *Arch Pathol Lab Med*. 2007;131:18–43.
43. Saini KS, Azim HA, Metzger-Filho O, Loi S, Sotiriou C, de Azambuja E, et al. Beyond trastuzumab: new treatment options for HER2-positive breast cancer. *Breast*. 2011;20 Suppl 3:S20-27.
44. Pathological features of advanced gastric cancer (GC): Relationship to human epidermal growth factor receptor 2 (HER2) positivity in the global screening programme of the ToGA trial | Journal of Clinical Oncology [Internet]. [cited 2020 Nov 26]. Available from: [https://ascopubs.org/doi/abs/10.1200/jco.2009.27.15\\_suppl.4556](https://ascopubs.org/doi/abs/10.1200/jco.2009.27.15_suppl.4556)
45. Baretton G, Dietel M, Gaiser T, Kirchner T, Kreipe HH, Quaas A, et al. HER2-Testung beim Magenkarzinom. *Pathologe*. 2016;37:361–6.
46. L'Agence technique de l'information sur l'hospitalisation (ATI). 28Z07Z - Chimiothérapie pour tumeur, en séances [Internet]. 2019 [cited 2020 Nov 26]. Available from: <https://www.aideaucodage.fr/ghm-28z07z>
47. Kassenärztliche Bundesvereinigung. Einheitlicher Bewertungsmaßstab (EBM). 2018.
48. eSalud. eSalud - Información económica del sector sanitario [Internet]. 2017 [cited 2020 Nov 26]. Available from: <http://esalud.oblikue.com/>
49. Prices - Inflation (CPI) - OECD Data [Internet]. [cited 2020 Nov 26]. Available from: [https://data.oecd.org/price/inflation-cpi.htm#indicator-chart%20\(26/02/2019](https://data.oecd.org/price/inflation-cpi.htm#indicator-chart%20(26/02/2019)
50. Regione Lombardia La Giunta. DELIBERAZIONE N° IX / 2946. 2012.
51. Burcombe R, Chan S, Simcock R, Samanta K, Percival F, Barrett-Lee P. Subcutaneous Trastuzumab (Herceptin®): A UK Time and Motion Study in Comparison with Intravenous Formulation for the Treatment of Patients with HER2-Positive Early Breast Cancer. *Advances in Breast Cancer Research*. Scientific Research Publishing; 2013;2:720–6.
52. Rule S, Collins GP, Samanta K. Subcutaneous vs intravenous rituximab in patients with non-Hodgkin lymphoma: a time and motion study in the United Kingdom. *J Med Econ*. 2014;17:459–68.
53. British Oncology Pharmacy Association. BOPA. 2017 [cited 2020 Nov 26]. Available from: <http://www.bopawebsite.org/publications/members-documents>

54. Unit Costs of Health and Social Care 2017 | PSSRU [Internet]. [cited 2020 Nov 26]. Available from: <https://www.pssru.ac.uk/project-pages/unit-costs/unit-costs-2017/>
